# Supplementary material
Source: publisher figshare collection journal article supplement (https://acs.figshare.com/ndownloader/files/8806042)

**Post-translational modifications (PTMs), identified on endogenous huntingtin, cluster within proteolytic domains between HEAT repeats**

Tamara Ratovitski,<sup>1\*</sup> Robert O'Meally,<sup>2</sup> Mali Jiang,<sup>1</sup> Raghothama Chaerkady,<sup>3</sup> Ekaterine Chighladze,<sup>1</sup> Jacqueline C. Stewart,<sup>4</sup> Xiaofang Wang,<sup>1</sup> Nicolas Arbez,<sup>1</sup> Elaine Roby,<sup>1</sup> Athanasios Alexandris,<sup>1</sup> Wenzhen Duan,<sup>1,5,6</sup> Ravi Vijayvargia,<sup>7#</sup> Ihn Sik Seong,<sup>7</sup> Daniel J. Lavery,<sup>8</sup>  
Robert N. Cole,<sup>2</sup> and Christopher A. Ross.<sup>1, 5,6\*</sup>

<sup>1</sup> Division of Neurobiology, Department of Psychiatry and Behavioral Sciences, Johns Hopkins University School of Medicine, 600 North Wolfe Street, CMSC 8-121, Baltimore, MD 21287

<sup>2</sup> Mass Spectrometry and Proteomics Facility, Department of Biological Chemistry, Johns Hopkins University School of Medicine, 733 N. Broadway Street, Suite 371 BRB Baltimore, MD 21205

<sup>3</sup> Antibody Discovery and Protein Engineering, MedImmune, One MedImmune Way, Gaithersburg, MD 20878

<sup>4</sup> Department of Radiation Oncology and Molecular Radiation Sciences, Johns Hopkins University Department of Medicine, David H. Koch Cancer Research Building, 416 A, Baltimore, MD 21287

<sup>5</sup> Department of Neurology and Program in Cellular and Molecular Medicine, Johns Hopkins University School of Medicine, Baltimore, MD 21287

<sup>6</sup> Departments of Pharmacology and Neuroscience, Johns Hopkins University School of Medicine, Baltimore, MD 21287

<sup>7</sup> Center for Human Genetic Research, Massachusetts General Hospital, Department of Neurology, Harvard Medical School, Simches Research Building Center for Human Genetics 185 Cambridge Street Boston, MA, 02114

<sup>8</sup> CHDI Foundation/CHDI Management Inc., 155 Village Boulevard, Suite 200, Princeton, NJ 08540

<sup>#</sup>Current address: Department of Biochemistry, M.S. University of Baroda, Vadodara, Gujarat, 390 002, India

\*Address correspondence to: Christopher A. Ross (caross@jhu.edu) or Tamara Ratovitski (tratovi1@jhmi.edu), CMSC 8-121, 600 North Wolfe Street, Baltimore, MD 21287, Fax: 410-614-0013

**Table of Content:**

Supplementary figure legends

Supplementary figures S1-S3

Supplementary Table S1

Supplementary spectra

### Supplementary figures legends

#### **Figure S1. Purification of endogenous FL-Htt for mass spectrometry from mouse brain.**

A, Total cell lysates from frozen whole brains of normal WT controls or homozygous KI Q175 mice were prepared as described in the Experimental Section. Htt proteins were immunoprecipitated with either anti-Htt 2166, or with anti-polyQ MW1 antibodies, as indicated, fractionated on NuPAGE 4-12% Bis-Tris polyacrylamide gels and stained with SimplyBlue Safe protein stain. Htt bands are marked with arrows. B, Small aliquots of inputs (1% of the sample), unbound fraction (1% of the sample), and eluted IP material (10% of the sample) were analyzed by Western blotting with antibodies to Htt (MAB2166). Htt protein bands were visualized using Molecular Imager Gel Doc XR System and quantified using Image J software. The results of quantification (shown at the bottom) demonstrate that at least 50% of Htt was remaining in the unbound fraction after pull-down of WT Htt with 2166 antibody, and of expanded Htt with MW1 antibody. Approximately 50% of Htt proteins were recovered from the eluted IP material.

**Figure S2. Validation of the specificity of antibodies to PTMs.** Total cell lysates were prepared from HEK293 cells transfected with indicated FL-Htt constructs- unmodified and with mutations of the phosphorylation sites. Htt proteins were immunoprecipitated with anti-polyQ MW1 antibody, fractionated on NuPAGE 4-12% Bis-Tris polyacrylamide gels and analyzed by Western blotting with indicated phospho-specific antibodies to Htt. The blots were stripped and re-probed with MW1 antibody for estimation of total Htt levels.

**Figure S3. Subcellular localization of expanded Htt is modulated by PTMs.** A, Striatal STHdh Q7/Q7 cells, <sup>36</sup> were transfected with indicated constructs encoding full-length Htt-82Q with alterations of phosphorylation (A) or acetylation (B) sites, and without PTM alterations. Cytoplasmic and nuclear fractions were prepared and analyzed as described in the Experimental

Section and in legend to Figure 7. Representative gels are shown for each construct. Htt protein bands were visualized using Molecular Imager Gel Doc XR System and quantified using Image J software. The results of quantification are presented on Figure 7B as a ratio of nuclear to cytoplasmic mean intensity values ( $\pm$  SEM), normalized to histone H1 (nuclear) and  $\beta$ -tubulin (cytoplasmic) as a loading control, for each PTM alteration.



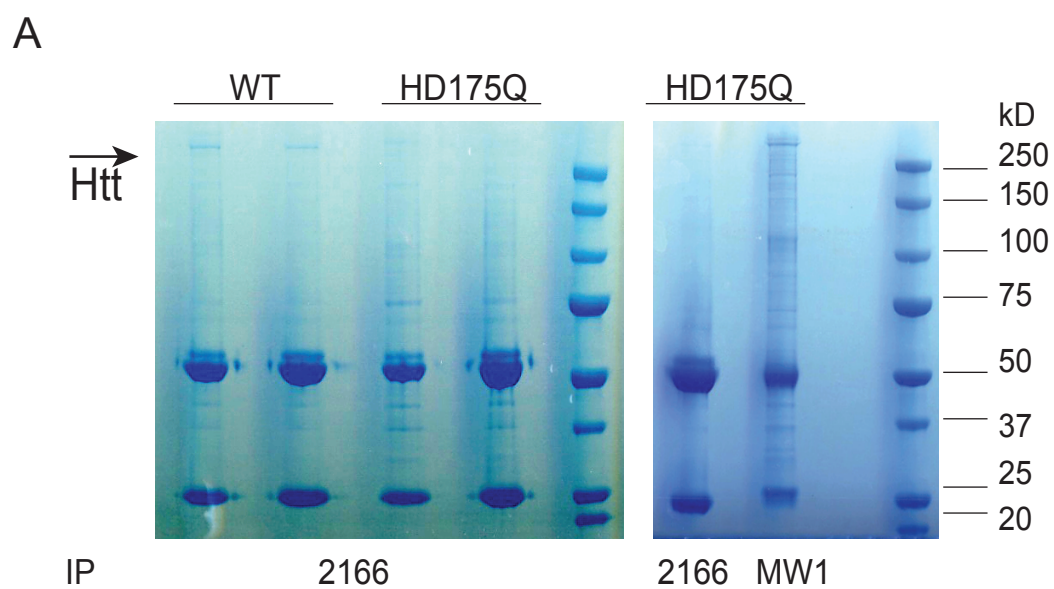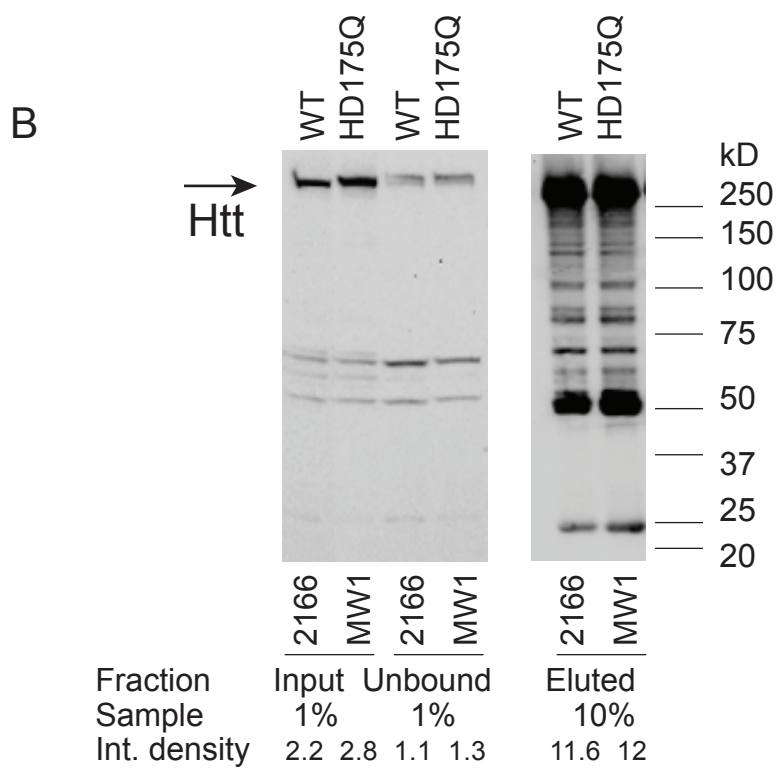

Figure S1

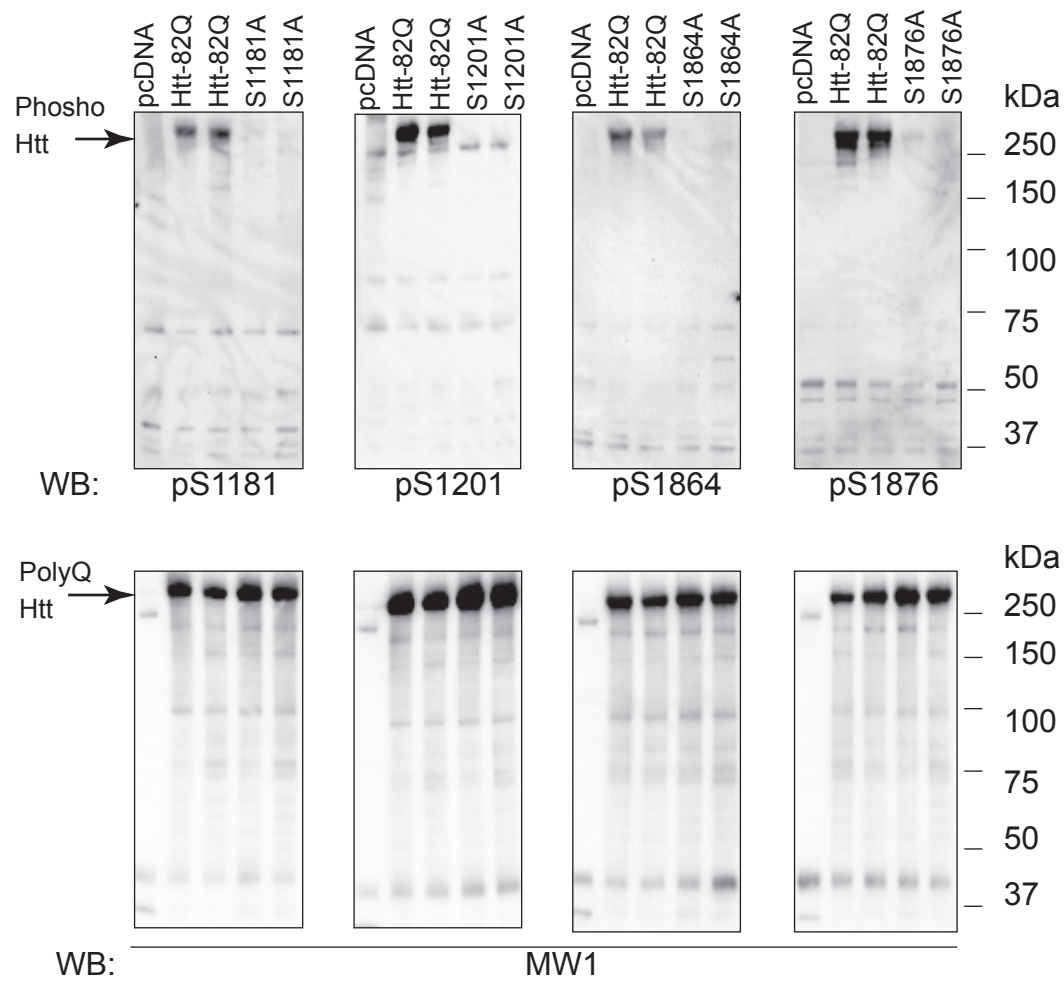

Figure S2

A

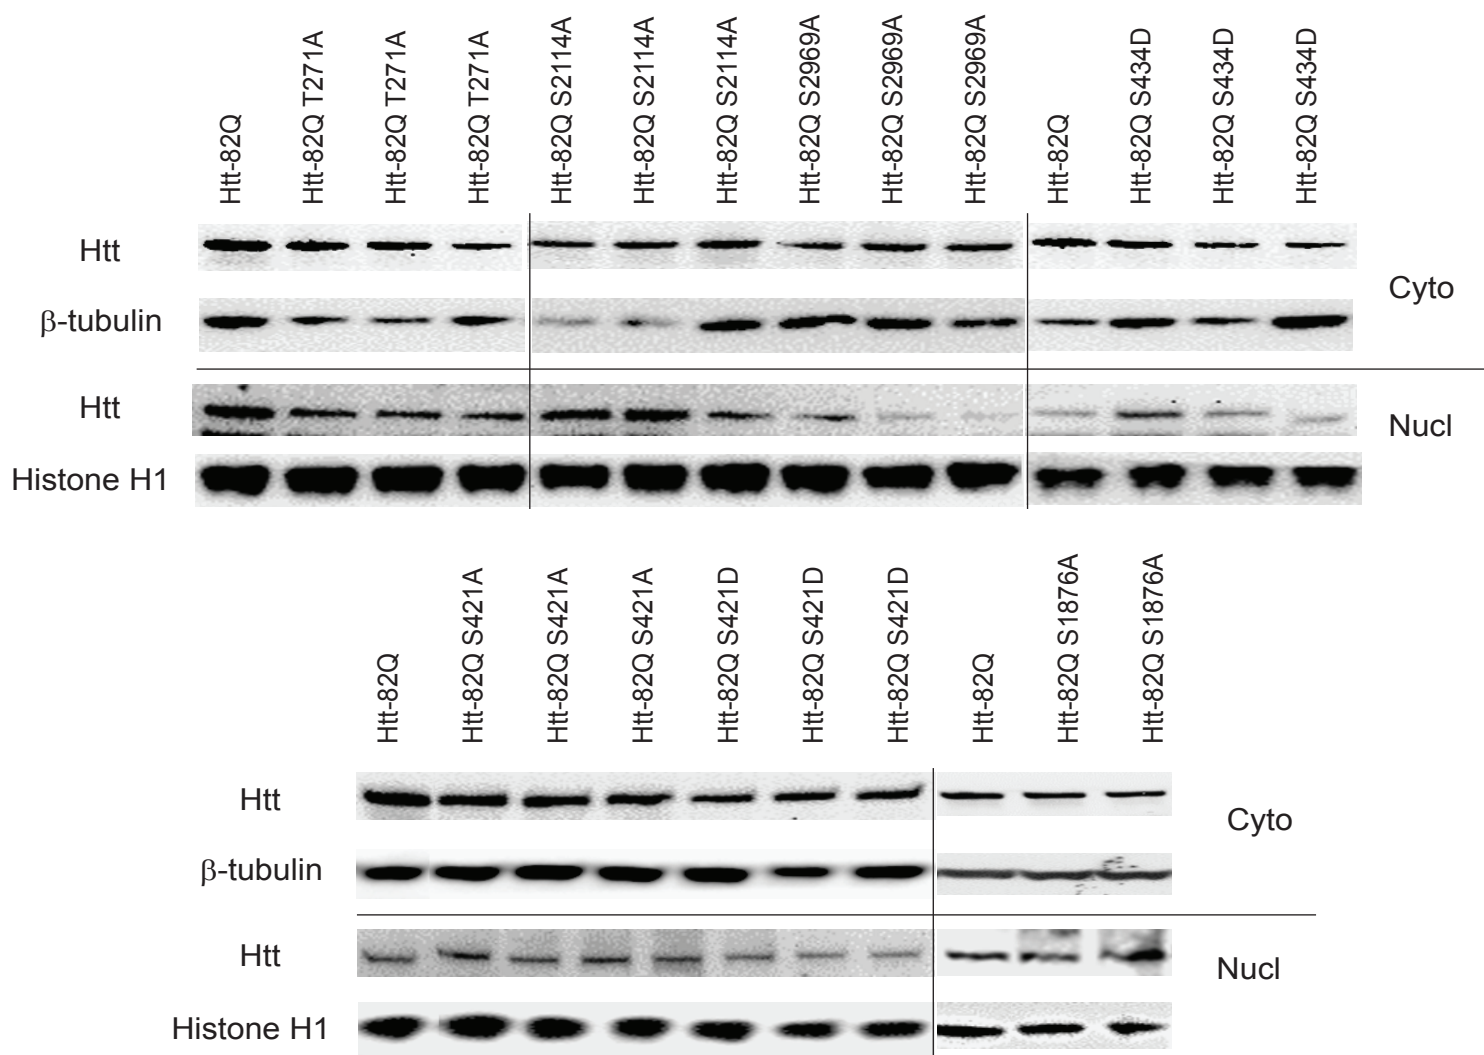

Figure S3

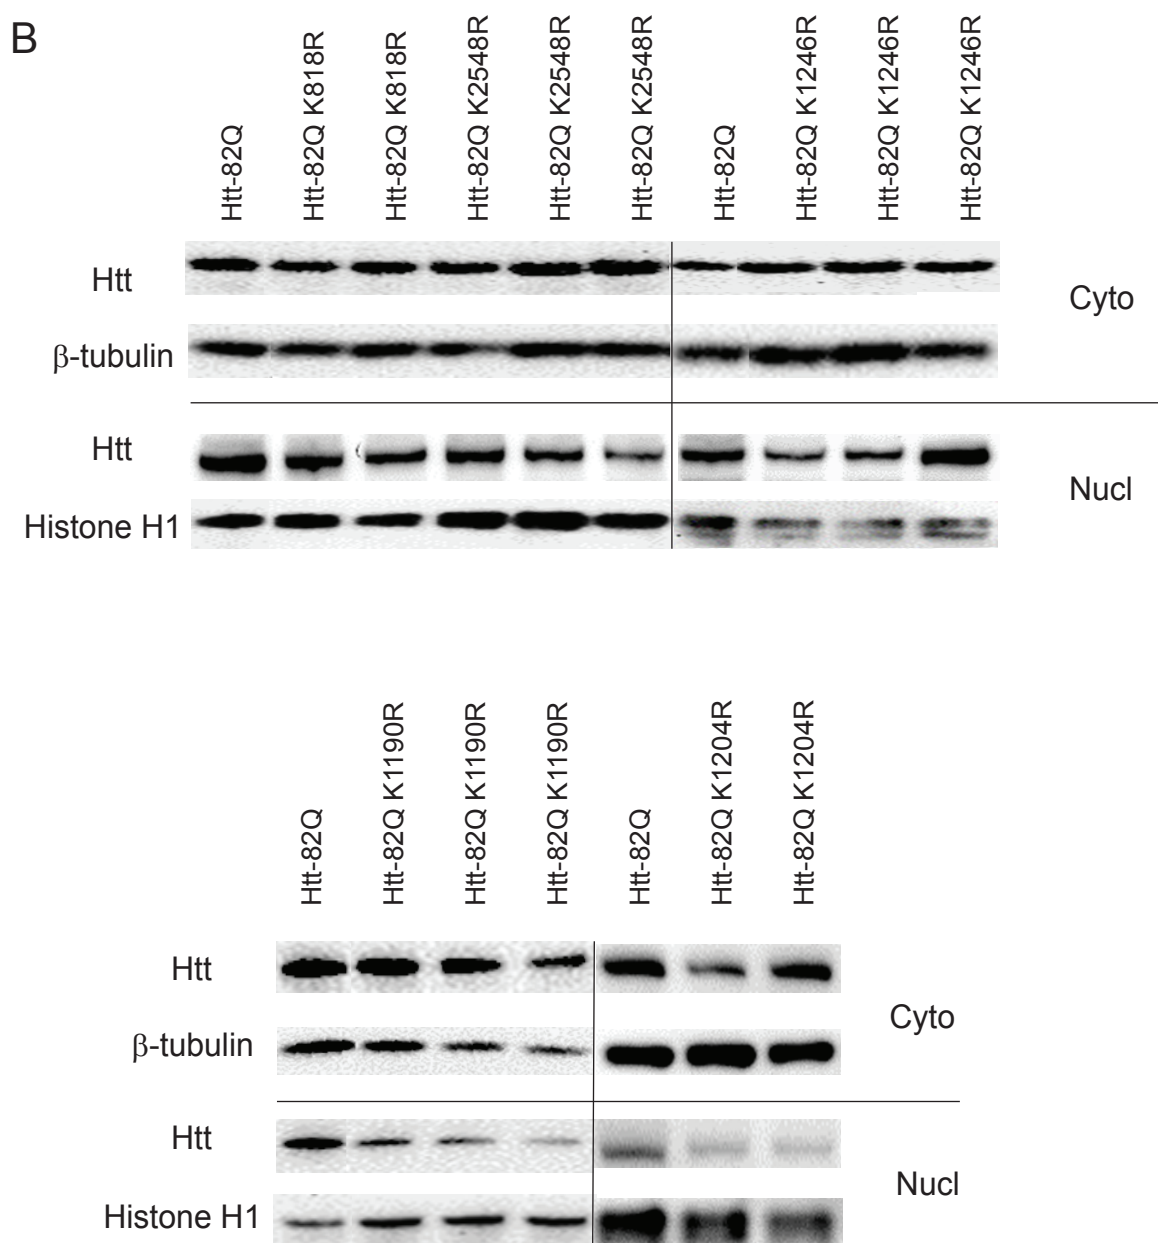

Figure S3

**Table S1. Synthetic peptides used to target PTMs on mouse Htt for identification and quantitation in TMT-based mass spectrometry experiments.**

| Sequence                 | Modification    | Targeted PTM site |
|--------------------------|-----------------|-------------------|
| EsLKsF                   | Phosphorylation | S13/S16           |
| VNHCLTICENIVAQsLRNSPEFQK | Phosphorylation | S116              |
| VNHCLTICENIVAQsLRNsPEFQK | Phosphorylation | S116; S120        |
| tAAGSAVSIcQHsR           | Phosphorylation | T271              |
| SGsIVELIAGGGSSCSPVLSR    | Phosphorylation | S421              |
| SGSIVELLAGGGScSPVLSR     | Phosphorylation | S432              |
| TLkDESSVTCK              | Acetylation     | K818              |
| AALPSLTNPPSLsPIRR        | Phosphorylation | S1181             |
| EKEPGEQASTPMSPK          | Acetylation     | K1190             |
| EKEPGEQASTPMsPK          | Acetylation     | K1190/S1201       |
| EPGEQASTPMsPK            | Phosphorylation | S1201             |
| kVGEASAASR               | Acetylation     | K1204             |
| LHDVLkATHANYK            | Acetylation     | K1246             |
| SLNPQksGEEEDSGSAAQLGMCNR | Acetyl/phospho  | K1875/S1876       |
| sGEEEDSGSAAQLGMCNR       | Phosphorylation | S1876             |
| sDSALLEGAEVLNR           | Phosphorylation | S2114             |
| SDsALLEGAEVLNR           | Phosphorylation | S2116             |
| kLSMIR                   | Acetylation     | K2548             |
| kGFPCEAR                 | Acetylation     | K2969             |

## Supplementary spectra

### S116-phospho, Htt from mouse brain

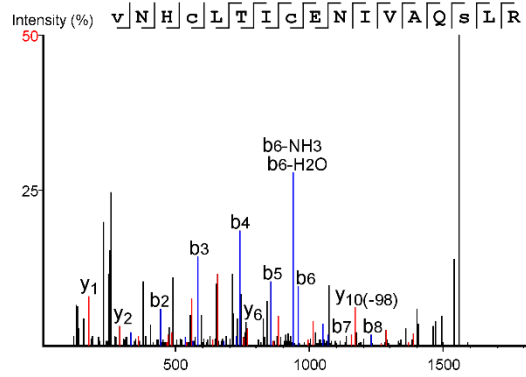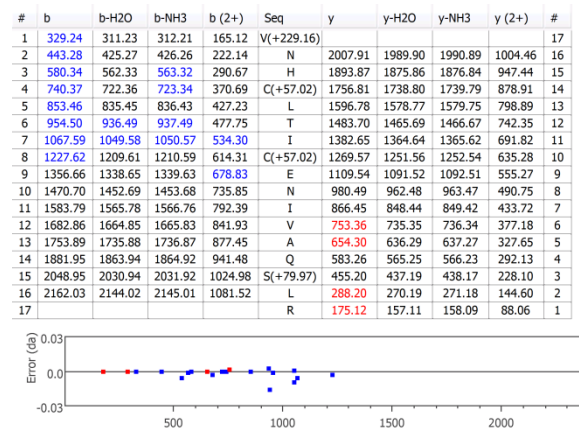

### T271-phospho, Htt from mouse brain

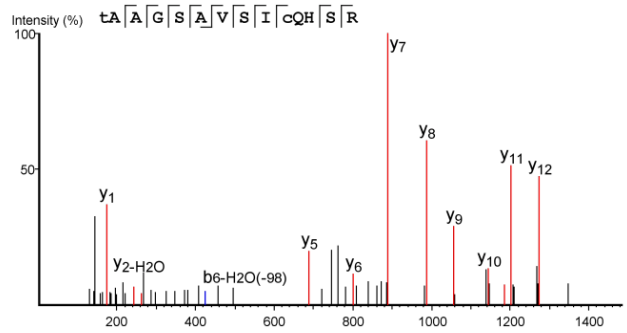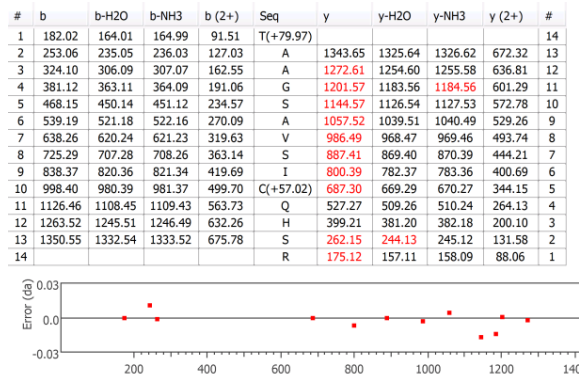

### T271-phospho, Htt from human brain

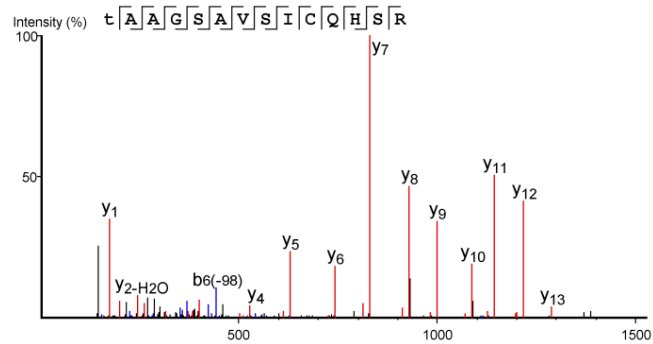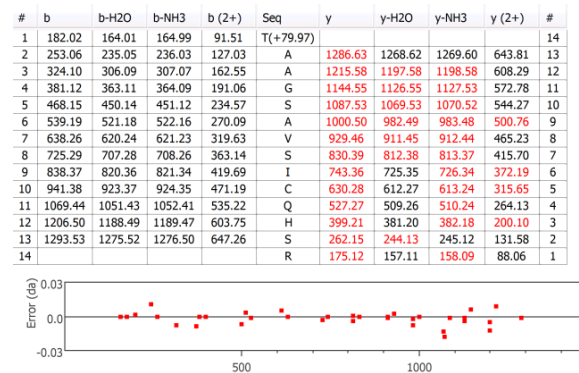

### S421-phospho and S434 –phospho, Htt from mouse brain

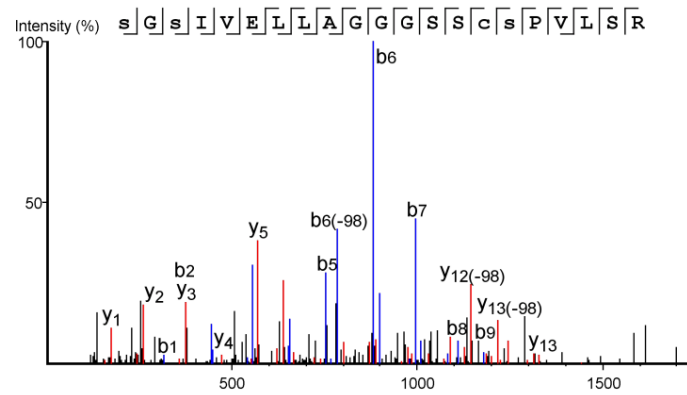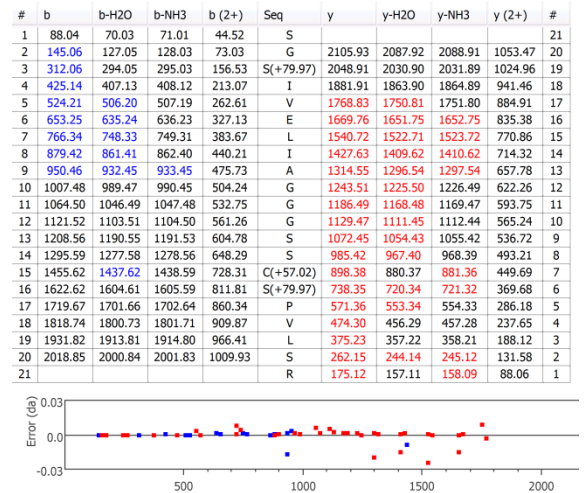

### S419-phospho and S434-phospho, hu Htt from HEK293

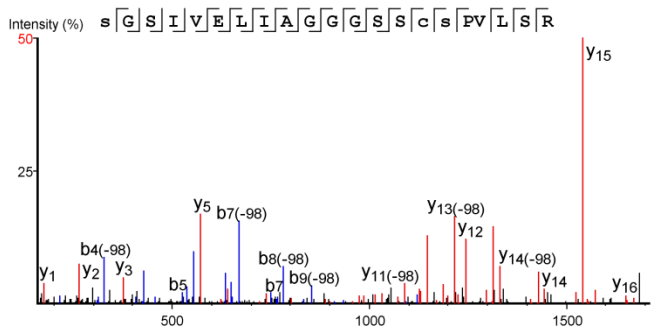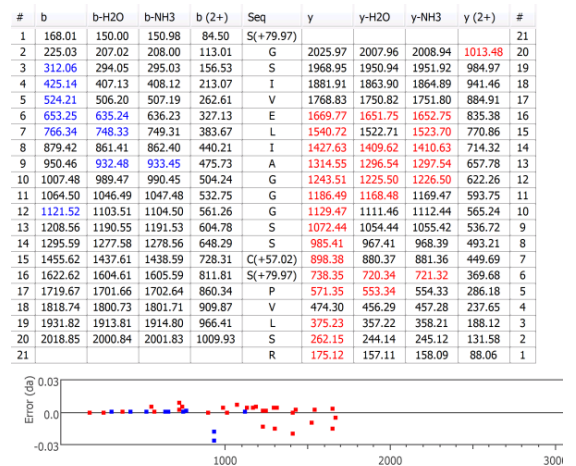

### S421-phospho and S434 –phospho, hu Htt from HEK293

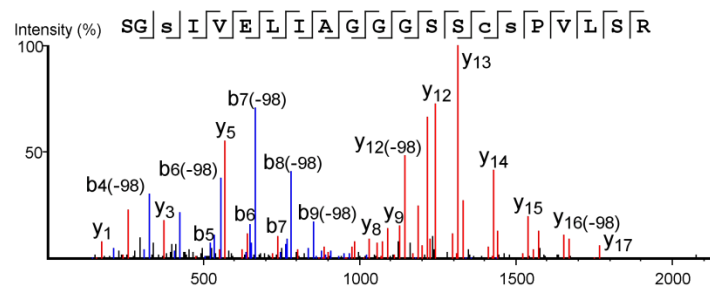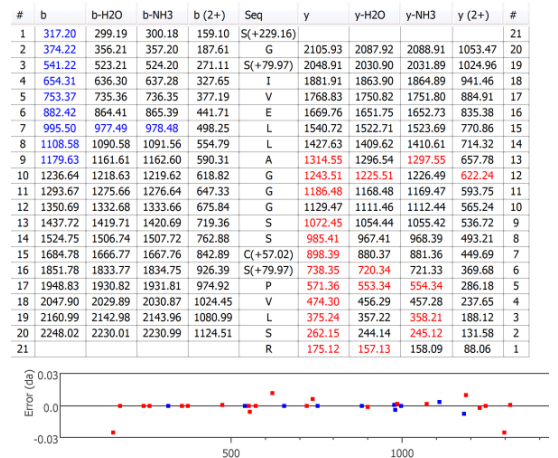



### S431-phospho, Htt from mouse brain

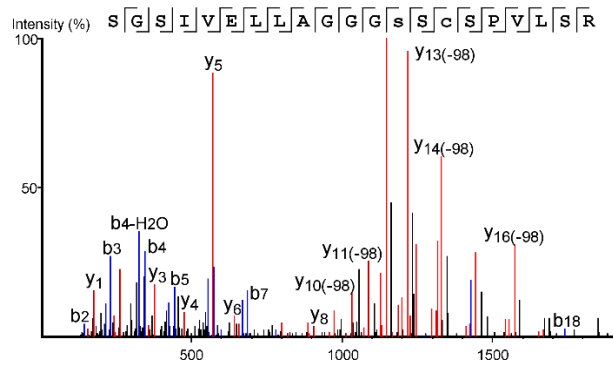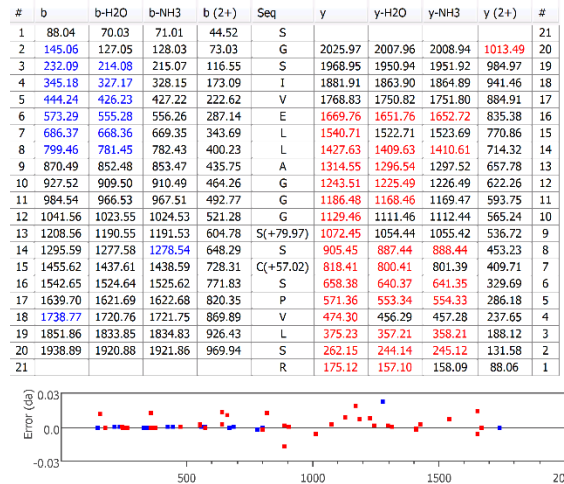

### S432-phospho, Htt from mouse brain

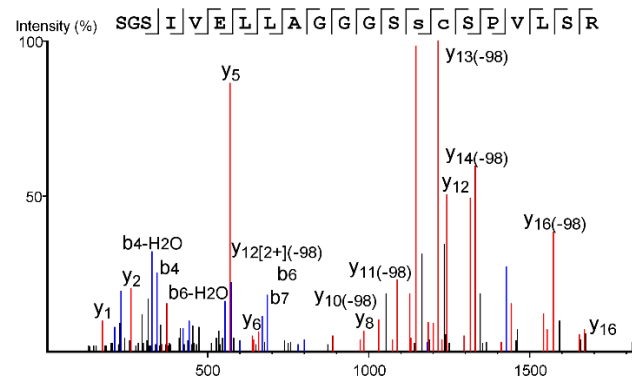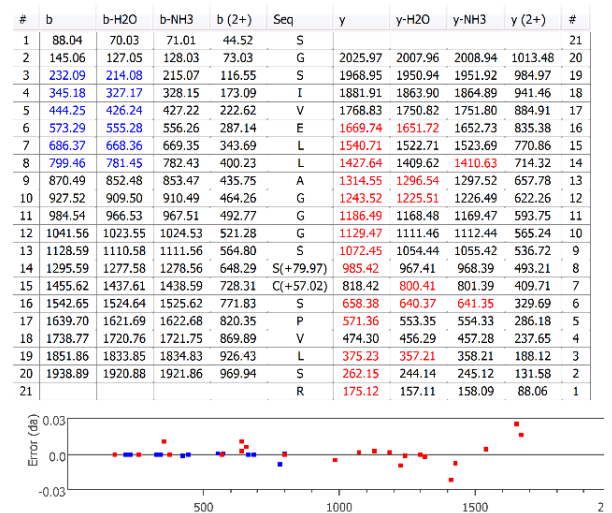

### S431-phospho, hu Htt from HEK293

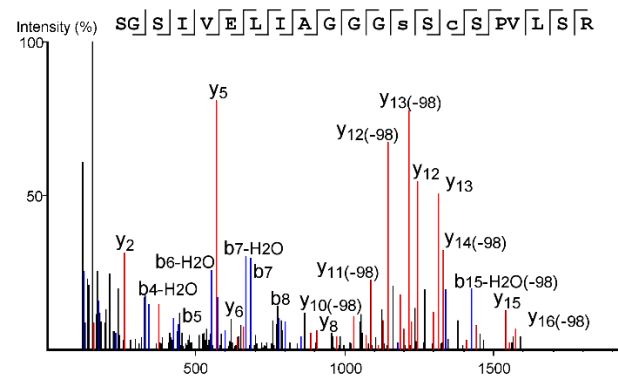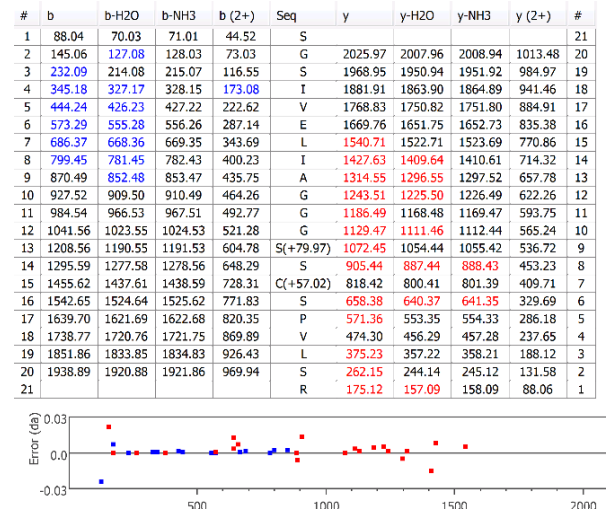



### S432-phospho, hu Htt from HEK293

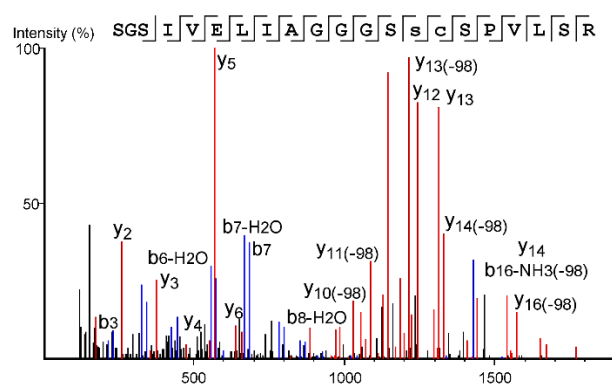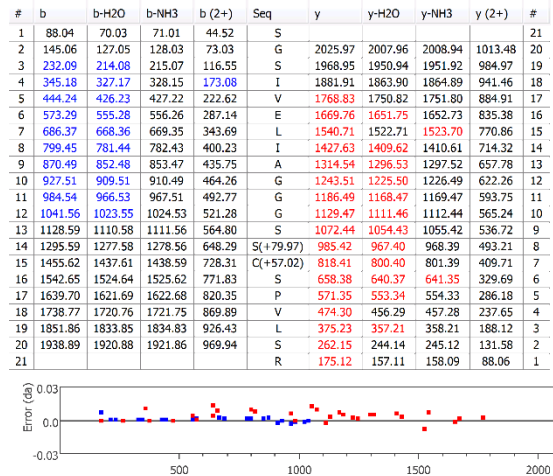

### S434-phospho, hu Htt from HEK293

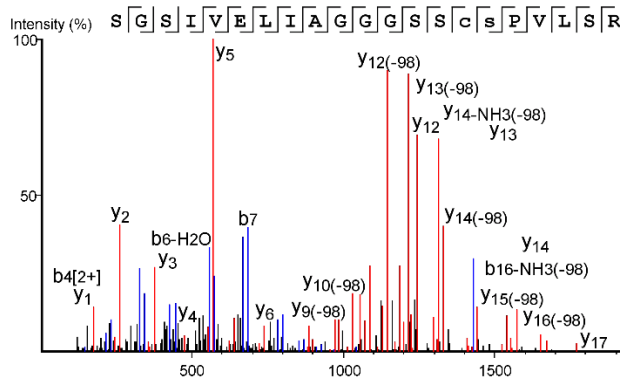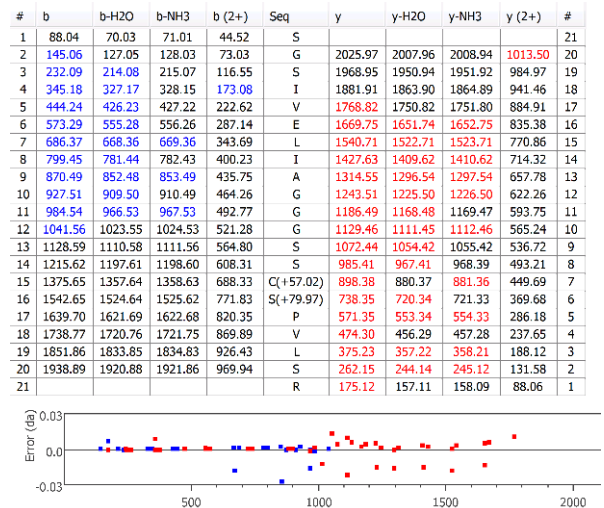

### K444-acetyl, hu Htt from HEK293

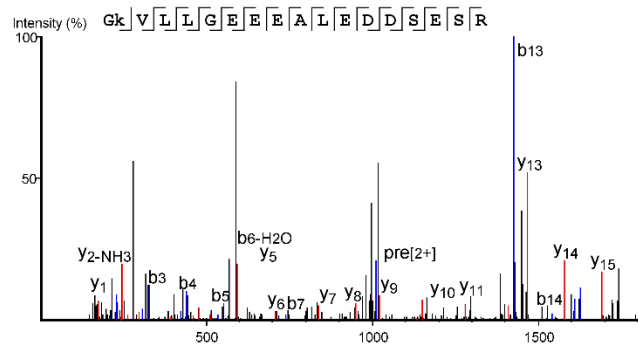

| #  | b       | b-H2O   | b-NH3   | b (2+) | Seq       | y       | y-H2O   | y-NH3   | y (2+) | #  |
|----|---------|---------|---------|--------|-----------|---------|---------|---------|--------|----|
| 1  | 58.03   | 40.02   | 41.00   | 29.51  | G         |         |         |         |        | 18 |
| 2  | 228.13  | 210.12  | 211.11  | 114.57 | K(+42.01) | 1960.93 | 1942.92 | 1943.91 | 980.97 | 17 |
| 3  | 327.20  | 309.19  | 310.18  | 164.10 | V         | 1790.83 | 1772.82 | 1773.80 | 895.91 | 16 |
| 4  | 440.29  | 422.28  | 423.26  | 220.64 | L         | 1691.76 | 1673.75 | 1674.73 | 846.38 | 15 |
| 5  | 553.37  | 535.36  | 536.34  | 277.19 | L         | 1578.68 | 1560.67 | 1561.65 | 789.84 | 14 |
| 6  | 610.39  | 592.38  | 593.37  | 305.70 | G         | 1465.59 | 1447.58 | 1448.57 | 733.30 | 13 |
| 7  | 739.43  | 721.42  | 722.41  | 370.22 | E         | 1408.56 | 1390.56 | 1391.54 | 704.79 | 12 |
| 8  | 868.48  | 850.47  | 851.45  | 434.74 | E         | 1279.52 | 1261.52 | 1262.50 | 640.26 | 11 |
| 9  | 997.52  | 979.51  | 980.49  | 499.26 | E         | 1150.49 | 1132.49 | 1133.46 | 575.74 | 10 |
| 10 | 1068.56 | 1050.55 | 1051.53 | 534.78 | A         | 1021.44 | 1003.43 | 1004.42 | 511.24 | 9  |
| 11 | 1181.64 | 1163.63 | 1164.61 | 591.32 | L         | 950.40  | 932.40  | 933.38  | 475.70 | 8  |
| 12 | 1310.68 | 1292.67 | 1293.66 | 655.84 | E         | 837.32  | 819.31  | 820.30  | 419.16 | 7  |
| 13 | 1425.72 | 1407.71 | 1408.68 | 713.36 | D         | 708.27  | 690.27  | 691.25  | 354.64 | 6  |
| 14 | 1540.71 | 1522.73 | 1523.71 | 770.87 | D         | 593.26  | 575.24  | 576.23  | 297.16 | 5  |
| 15 | 1627.76 | 1609.76 | 1610.74 | 814.39 | S         | 478.23  | 460.22  | 461.20  | 239.61 | 4  |
| 16 | 1756.81 | 1738.80 | 1739.79 | 878.91 | E         | 391.20  | 373.18  | 374.17  | 196.10 | 3  |
| 17 | 1843.84 | 1825.83 | 1826.82 | 922.42 | S         | 262.15  | 244.17  | 245.13  | 131.58 | 2  |
| 18 |         |         |         |        | R         | 175.12  | 157.11  | 158.09  | 88.06  | 1  |

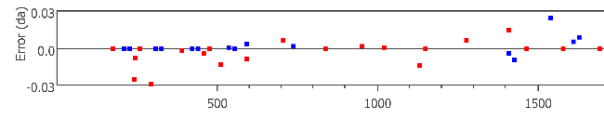

### K818-acetyl, Htt from mouse brain

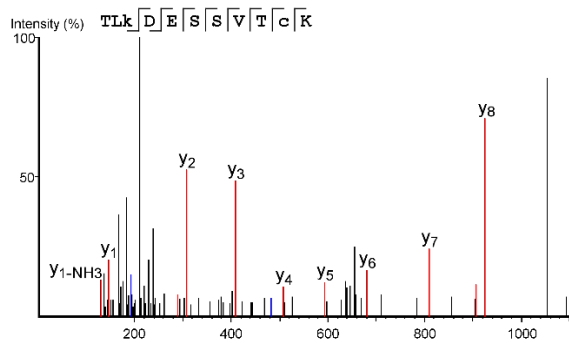

| #  | b       | b-H2O   | b-NH3   | b (2+) | Seq       | y       | y-H2O   | y-NH3   | y (2+) | #  |
|----|---------|---------|---------|--------|-----------|---------|---------|---------|--------|----|
| 1  | 102.06  | 84.04   | 85.03   | 51.53  | T         |         |         |         |        | 11 |
| 2  | 215.14  | 197.13  | 198.11  | 108.07 | L         | 1208.58 | 1190.57 | 1191.56 | 604.79 | 10 |
| 3  | 385.25  | 367.23  | 368.22  | 193.13 | K(+42.01) | 1095.50 | 1077.49 | 1078.47 | 548.25 | 9  |
| 4  | 500.27  | 482.27  | 483.25  | 250.64 | D         | 925.39  | 907.39  | 908.37  | 463.20 | 8  |
| 5  | 629.31  | 611.30  | 612.29  | 315.16 | E         | 810.37  | 792.36  | 793.34  | 405.68 | 7  |
| 6  | 716.35  | 698.34  | 699.32  | 358.67 | S         | 681.32  | 663.31  | 664.30  | 341.16 | 6  |
| 7  | 803.38  | 785.37  | 786.35  | 402.19 | S         | 594.30  | 576.28  | 577.26  | 297.65 | 5  |
| 8  | 902.45  | 884.44  | 885.42  | 451.72 | V         | 507.26  | 489.25  | 490.23  | 254.13 | 4  |
| 9  | 1003.49 | 985.48  | 986.47  | 502.25 | T         | 408.19  | 390.18  | 391.16  | 204.60 | 3  |
| 10 | 1163.53 | 1145.51 | 1146.50 | 582.26 | C(+57.02) | 307.14  | 289.13  | 290.12  | 154.07 | 2  |
| 11 |         |         |         |        | K         | 147.11  | 129.10  | 130.09  | 74.06  | 1  |

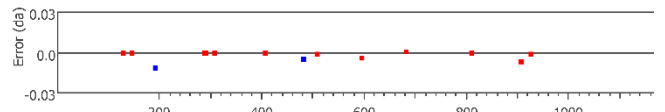

### K818-acetyl, Htt from human brain

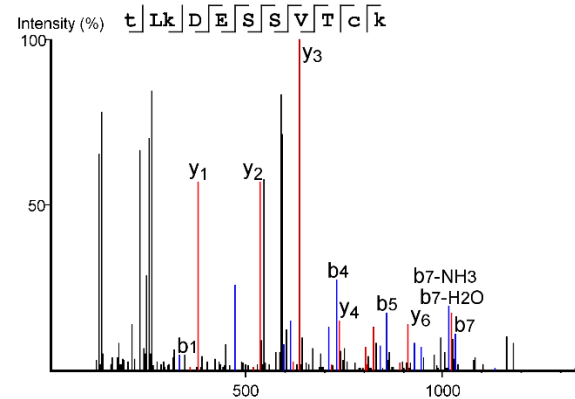

| #  | b       | b-H2O   | b-NH3   | b (2+) | Seq        | y       | y-H2O   | y-NH3   | y (2+) | #  |
|----|---------|---------|---------|--------|------------|---------|---------|---------|--------|----|
| 1  | 331.22  | 313.21  | 314.19  | 166.11 | T(+229.16) |         |         |         |        | 11 |
| 2  | 444.30  | 426.29  | 427.28  | 222.65 | L          | 1437.75 | 1419.74 | 1420.72 | 719.37 | 10 |
| 3  | 614.41  | 596.39  | 597.38  | 307.70 | K(+42.01)  | 1324.66 | 1306.65 | 1307.63 | 662.83 | 9  |
| 4  | 729.43  | 711.42  | 712.41  | 365.22 | D          | 1154.56 | 1136.55 | 1137.53 | 577.78 | 8  |
| 5  | 858.47  | 840.47  | 841.46  | 429.74 | E          | 1039.53 | 1021.51 | 1022.50 | 520.26 | 7  |
| 6  | 945.51  | 927.49  | 928.48  | 473.26 | S          | 910.49  | 892.47  | 893.46  | 455.74 | 6  |
| 7  | 1032.54 | 1014.53 | 1015.53 | 516.77 | S          | 823.45  | 805.44  | 806.43  | 412.23 | 5  |
| 8  | 1131.60 | 1113.60 | 1114.58 | 566.30 | V          | 736.42  | 718.41  | 719.40  | 368.71 | 4  |
| 9  | 1232.66 | 1214.65 | 1215.63 | 616.83 | T          | 637.35  | 619.34  | 620.35  | 319.18 | 3  |
| 10 | 1392.69 | 1374.68 | 1375.66 | 696.84 | C(+57.02)  | 536.31  | 518.30  | 519.28  | 268.65 | 2  |
| 11 |         |         |         |        | K(+229.16) | 376.27  | 358.27  | 359.25  | 188.64 | 1  |

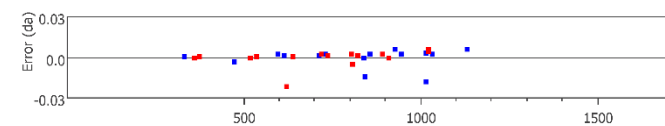

### S1181-phospho, Htt from mouse brain

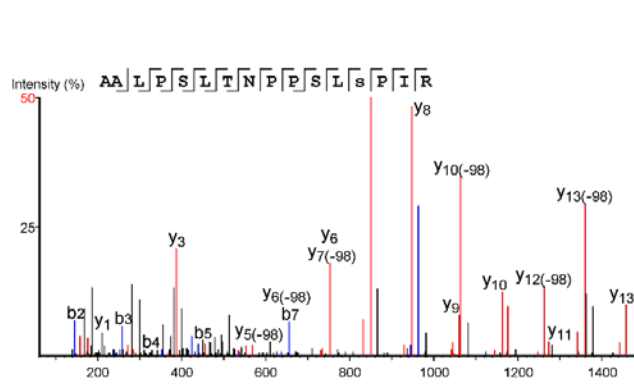

| #  | b       | b-H2O   | b-NH3   | b (2+) | Seq       | y       | y-H2O   | y-NH3   | y (2+) | #  |
|----|---------|---------|---------|--------|-----------|---------|---------|---------|--------|----|
| 1  | 72.04   | 54.03   | 55.02   | 36.52  | A         |         |         |         |        | 16 |
| 2  | 143.08  | 125.07  | 126.06  | 72.04  | A         | 1642.86 | 1624.85 | 1625.83 | 821.93 | 15 |
| 3  | 256.17  | 238.16  | 239.14  | 128.58 | L         | 1571.82 | 1553.81 | 1554.79 | 786.41 | 14 |
| 4  | 353.22  | 335.21  | 336.19  | 177.11 | P         | 1458.73 | 1440.73 | 1441.71 | 729.87 | 13 |
| 5  | 440.25  | 422.24  | 423.22  | 220.63 | S         | 1361.68 | 1343.67 | 1344.66 | 681.34 | 12 |
| 6  | 553.33  | 535.32  | 536.31  | 277.17 | L         | 1274.64 | 1256.64 | 1257.62 | 637.83 | 11 |
| 7  | 654.39  | 636.37  | 637.36  | 327.69 | T         | 1161.56 | 1143.56 | 1144.55 | 581.28 | 10 |
| 8  | 768.43  | 750.41  | 751.40  | 384.71 | N         | 1060.52 | 1042.52 | 1043.49 | 530.76 | 9  |
| 9  | 865.48  | 847.47  | 848.45  | 433.24 | P         | 946.48  | 928.46  | 929.46  | 473.74 | 8  |
| 10 | 962.54  | 944.53  | 945.52  | 481.77 | P         | 849.42  | 831.41  | 832.40  | 425.21 | 7  |
| 11 | 1049.56 | 1031.55 | 1032.54 | 525.28 | S         | 752.37  | 734.39  | 735.34  | 376.69 | 6  |
| 12 | 1162.65 | 1144.64 | 1145.62 | 581.82 | L         | 665.34  | 647.33  | 648.31  | 333.17 | 5  |
| 13 | 1329.65 | 1311.64 | 1312.62 | 665.32 | S(+79.97) | 552.25  | 534.24  | 535.23  | 276.63 | 4  |
| 14 | 1426.70 | 1408.69 | 1409.67 | 713.85 | P         | 385.26  | 367.25  | 368.23  | 193.13 | 3  |
| 15 | 1539.78 | 1521.77 | 1522.76 | 770.39 | I         | 288.20  | 270.18  | 271.18  | 144.60 | 2  |
| 16 |         |         |         |        | R         | 175.12  | 157.10  | 158.09  | 88.06  | 1  |

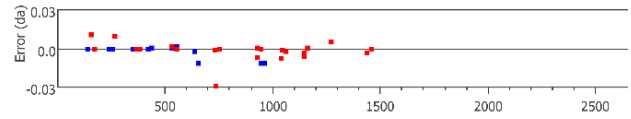

### S1181-phospho, Htt from human brain

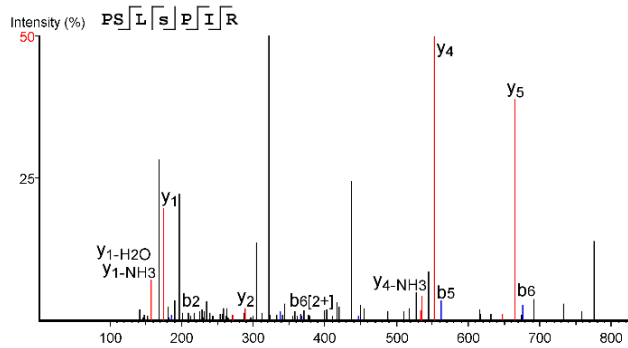

| # | b      | b-H2O  | b-NH3  | b (2+) | Seq       | y      | y-H2O  | y-NH3  | y (2+) | # |
|---|--------|--------|--------|--------|-----------|--------|--------|--------|--------|---|
| 1 | 98.06  | 80.05  | 81.03  | 49.53  | P         |        |        |        |        | 7 |
| 2 | 185.09 | 167.08 | 168.07 | 93.05  | S         | 752.37 | 734.36 | 735.34 | 376.69 | 6 |
| 3 | 298.18 | 280.17 | 281.15 | 149.59 | L         | 665.32 | 647.33 | 648.29 | 333.17 | 5 |
| 4 | 465.18 | 447.16 | 448.15 | 233.09 | S(+79.97) | 552.24 | 534.23 | 535.21 | 276.63 | 4 |
| 5 | 562.22 | 544.22 | 545.20 | 281.61 | P         | 385.26 | 367.25 | 368.23 | 193.13 | 3 |
| 6 | 675.31 | 657.30 | 658.28 | 338.15 | I         | 288.20 | 270.19 | 271.18 | 144.60 | 2 |
| 7 |        |        |        |        | R         | 175.12 | 157.10 | 158.09 | 88.06  | 1 |

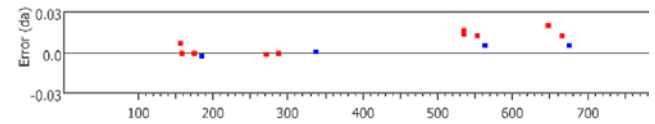

### K1190-acetyl, Htt from mouse brain

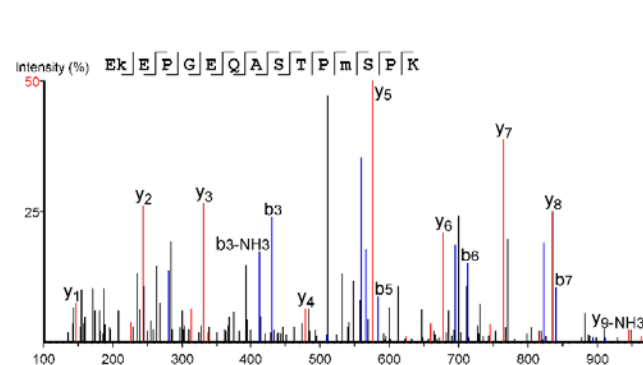

| #  | b       | b-H2O   | b-NH3   | b (2+) | Seq       | y       | y-H2O   | y-NH3   | y (2+) | #  |
|----|---------|---------|---------|--------|-----------|---------|---------|---------|--------|----|
| 1  | 130.05  | 112.04  | 113.02  | 65.53  | E         |         |         |         |        | 15 |
| 2  | 300.16  | 282.14  | 283.13  | 150.58 | K(+42.01) | 1544.73 | 1526.72 | 1527.70 | 772.86 | 14 |
| 3  | 429.20  | 411.19  | 412.18  | 215.10 | E         | 1374.62 | 1356.61 | 1357.59 | 687.81 | 13 |
| 4  | 526.25  | 508.24  | 509.22  | 263.63 | P         | 1245.58 | 1227.57 | 1228.55 | 623.29 | 12 |
| 5  | 583.27  | 565.26  | 566.25  | 292.14 | G         | 1148.53 | 1130.51 | 1131.50 | 574.76 | 11 |
| 6  | 712.31  | 694.30  | 695.29  | 356.66 | E         | 1091.50 | 1073.49 | 1074.48 | 546.25 | 10 |
| 7  | 840.37  | 822.36  | 823.35  | 420.69 | Q         | 962.47  | 944.45  | 945.44  | 481.73 | 9  |
| 8  | 911.41  | 893.40  | 894.38  | 456.21 | A         | 834.40  | 816.39  | 817.38  | 417.70 | 8  |
| 9  | 998.44  | 980.43  | 981.42  | 499.72 | S         | 763.36  | 745.35  | 746.36  | 382.18 | 7  |
| 10 | 1099.49 | 1081.48 | 1082.46 | 550.25 | T         | 676.33  | 658.32  | 659.33  | 338.65 | 6  |
| 11 | 1196.54 | 1178.53 | 1179.52 | 598.77 | P         | 575.28  | 557.28  | 558.26  | 288.14 | 5  |
| 12 | 1343.58 | 1325.57 | 1326.55 | 672.29 | M(+15.99) | 478.23  | 460.22  | 461.21  | 239.62 | 4  |
| 13 | 1430.61 | 1412.60 | 1413.58 | 715.81 | S         | 331.20  | 313.19  | 314.17  | 166.10 | 3  |
| 14 | 1527.66 | 1509.65 | 1510.64 | 764.33 | P         | 244.17  | 226.15  | 227.11  | 122.58 | 2  |
| 15 |         |         |         |        | K         | 147.11  | 129.10  | 130.09  | 74.06  | 1  |

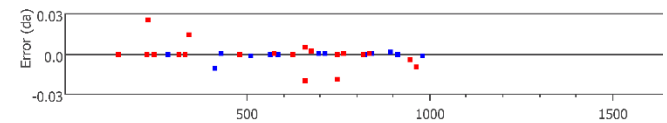

### S1201-phospho, Htt from mouse brain

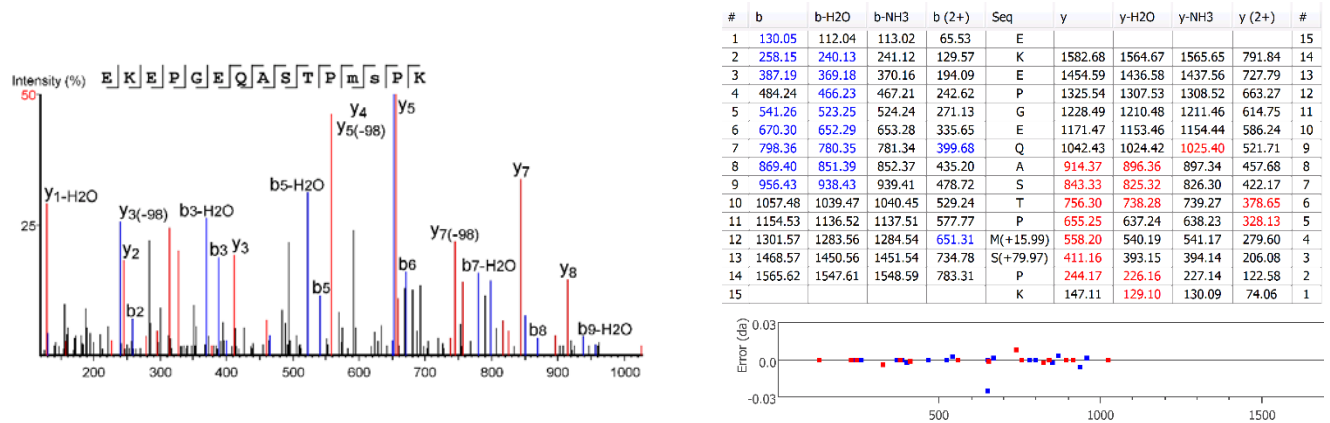

### S1201-phospho, hu Htt from HEK293

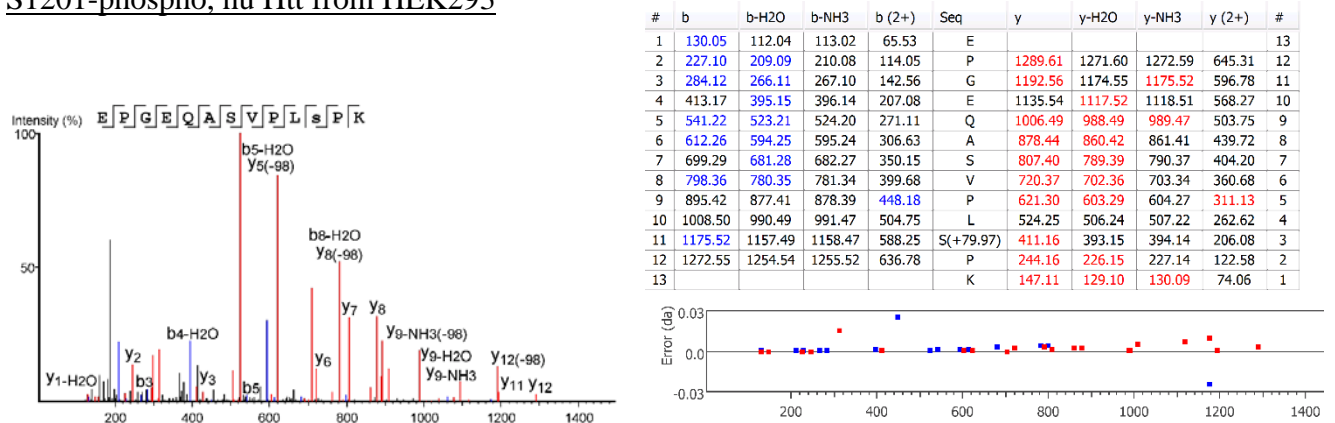

### K1190-acetyl and S1201-phospho, hu Htt from HEK293

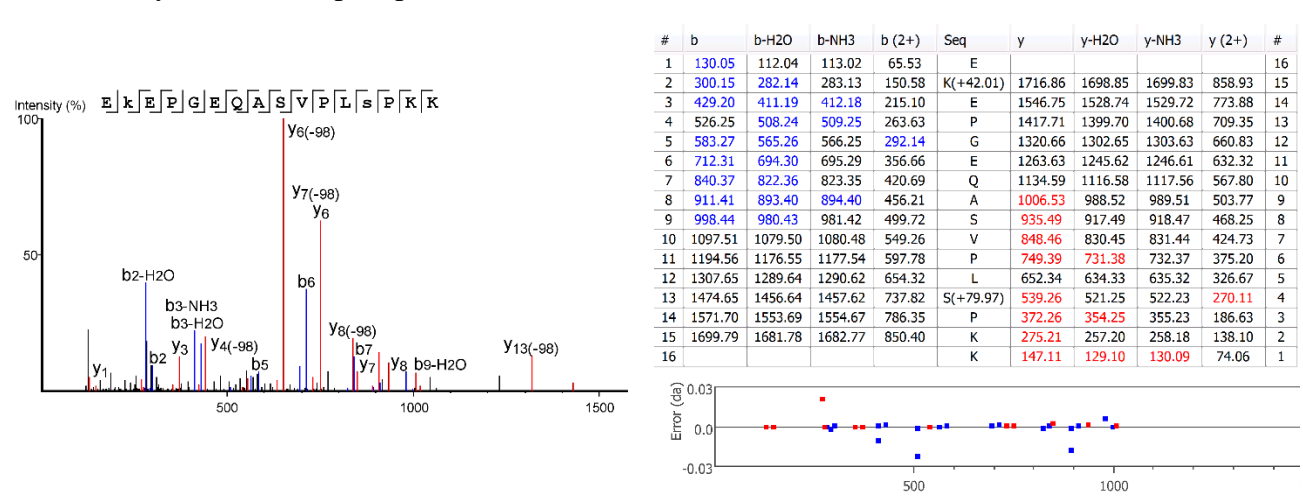

### K1203-acetyl, hu Htt from HEK293

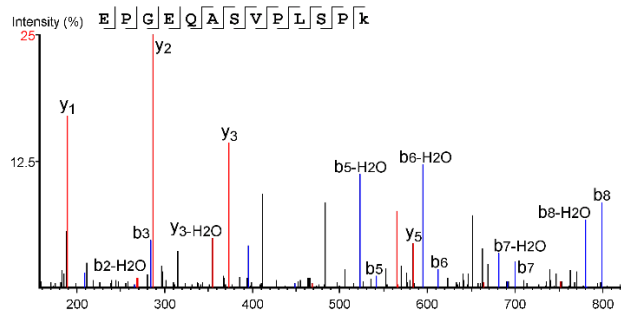

| #  | b       | b-H <sub>2</sub> O | b-NH <sub>3</sub> | b (2+)    | Seq | y       | y-H <sub>2</sub> O | y-NH <sub>3</sub> | y (2+) | #  |
|----|---------|--------------------|-------------------|-----------|-----|---------|--------------------|-------------------|--------|----|
| 1  | 130.05  | 112.04             | 113.02            | 65.53     | E   |         |                    |                   |        | 13 |
| 2  | 227.10  | 209.09             | 210.08            | 114.05    | P   | 1251.66 | 1233.65            | 1234.63           | 626.33 | 12 |
| 3  | 284.12  | 266.11             | 267.10            | 142.56    | G   | 1154.61 | 1136.59            | 1137.58           | 577.80 | 11 |
| 4  | 413.17  | 395.16             | 396.14            | 207.08    | E   | 1097.58 | 1079.57            | 1080.56           | 549.29 | 10 |
| 5  | 541.22  | 523.21             | 524.20            | 271.11    | Q   | 968.54  | 950.53             | 951.51            | 484.77 | 9  |
| 6  | 612.26  | 594.25             | 595.24            | 306.63    | A   | 840.48  | 822.47             | 823.46            | 420.74 | 8  |
| 7  | 699.29  | 681.28             | 682.27            | 350.15    | S   | 769.45  | 751.43             | 752.42            | 385.22 | 7  |
| 8  | 798.36  | 780.35             | 781.35            | 399.68    | V   | 682.41  | 664.40             | 665.39            | 341.71 | 6  |
| 9  | 895.41  | 877.41             | 878.39            | 448.18    | P   | 583.34  | 565.33             | 566.34            | 292.17 | 5  |
| 10 | 1008.50 | 990.49             | 991.48            | 504.75    | L   | 486.29  | 468.28             | 469.27            | 243.65 | 4  |
| 11 | 1095.53 | 1077.52            | 1078.51           | 548.27    | S   | 373.21  | 355.20             | 356.18            | 187.10 | 3  |
| 12 | 1192.58 | 1174.57            | 1175.56           | 596.79    | P   | 286.18  | 268.17             | 269.12            | 143.59 | 2  |
| 13 |         |                    |                   | K(+42.01) |     | 189.12  | 171.11             | 172.10            | 95.06  | 1  |

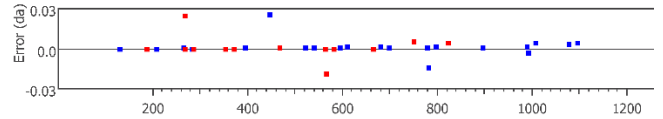

### K1204-acetyl, Htt from mouse brain

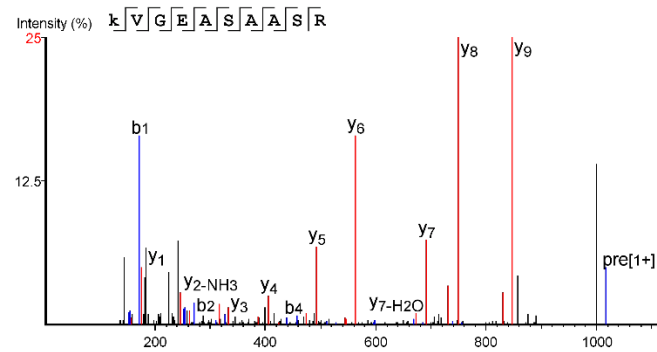

| #  | b      | b-H <sub>2</sub> O | b-NH <sub>3</sub> | b (2+) | Seq       | y      | y-H <sub>2</sub> O | y-NH <sub>3</sub> | y (2+) | #  |
|----|--------|--------------------|-------------------|--------|-----------|--------|--------------------|-------------------|--------|----|
| 1  | 171.11 | 153.10             | 154.09            | 86.06  | K(+42.01) |        |                    |                   |        | 10 |
| 2  | 270.18 | 252.17             | 253.15            | 135.59 | V         | 847.43 | 829.42             | 830.40            | 424.18 | 9  |
| 3  | 327.20 | 309.19             | 310.18            | 164.10 | G         | 748.36 | 730.35             | 731.34            | 374.68 | 8  |
| 4  | 456.25 | 438.23             | 439.22            | 228.62 | E         | 691.34 | 673.33             | 674.31            | 346.17 | 7  |
| 5  | 527.25 | 509.27             | 510.26            | 264.14 | A         | 562.29 | 544.29             | 545.27            | 281.65 | 6  |
| 6  | 614.31 | 596.30             | 597.29            | 307.66 | S         | 491.26 | 473.25             | 474.23            | 246.13 | 5  |
| 7  | 685.35 | 667.34             | 668.32            | 343.18 | A         | 404.23 | 386.21             | 387.20            | 202.61 | 4  |
| 8  | 756.39 | 738.38             | 739.36            | 378.69 | A         | 333.19 | 315.18             | 316.16            | 167.09 | 3  |
| 9  | 843.42 | 825.41             | 826.39            | 422.21 | S         | 262.15 | 244.14             | 245.12            | 131.58 | 2  |
| 10 |        |                    |                   |        | R         | 175.12 | 157.10             | 158.09            | 88.06  | 1  |

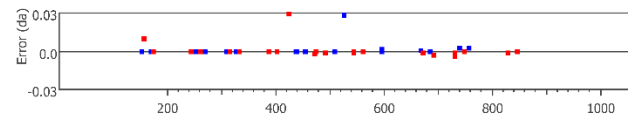

### K1204-acetyl, hu Htt from HEK293

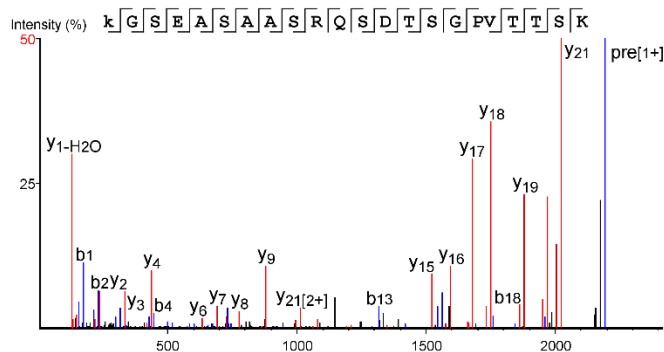

| #  | b       | b-H <sub>2</sub> O | b-NH <sub>3</sub> | b (2+)  | Seq       | y       | y-H <sub>2</sub> O | y-NH <sub>3</sub> | y (2+)  | #  |
|----|---------|--------------------|-------------------|---------|-----------|---------|--------------------|-------------------|---------|----|
| 1  | 171.11  | 153.10             | 154.09            | 86.06   | K(+42.01) |         |                    |                   |         | 22 |
| 2  | 228.13  | 210.12             | 211.11            | 114.57  | G         | 2023.95 | 2005.94            | 2006.93           | 1012.48 | 21 |
| 3  | 315.17  | 297.16             | 298.14            | 158.08  | S         | 1966.92 | 1948.91            | 1949.90           | 983.97  | 20 |
| 4  | 444.21  | 426.20             | 427.18            | 222.60  | E         | 1879.89 | 1861.88            | 1862.87           | 940.45  | 19 |
| 5  | 515.24  | 497.24             | 498.22            | 258.12  | A         | 1750.85 | 1732.83            | 1733.83           | 875.93  | 18 |
| 6  | 602.28  | 584.27             | 585.25            | 301.64  | S         | 1679.81 | 1661.80            | 1662.80           | 840.41  | 17 |
| 7  | 673.32  | 655.30             | 656.29            | 337.19  | A         | 1592.78 | 1574.77            | 1575.76           | 796.89  | 16 |
| 8  | 744.34  | 726.34             | 727.33            | 372.68  | A         | 1521.75 | 1503.74            | 1504.72           | 761.38  | 15 |
| 9  | 831.38  | 813.37             | 814.36            | 416.21  | S         | 1450.71 | 1432.70            | 1433.69           | 725.86  | 14 |
| 10 | 987.49  | 969.48             | 970.46            | 494.24  | R         | 1363.68 | 1345.67            | 1346.63           | 682.34  | 13 |
| 11 | 1115.54 | 1097.53            | 1098.52           | 558.27  | Q         | 1207.59 | 1189.57            | 1190.55           | 604.29  | 12 |
| 12 | 1202.58 | 1184.57            | 1185.55           | 601.79  | S         | 1079.51 | 1061.51            | 1062.48           | 540.26  | 11 |
| 13 | 1317.59 | 1299.59            | 1300.58           | 659.30  | D         | 992.49  | 974.48             | 975.46            | 496.74  | 10 |
| 14 | 1418.65 | 1400.64            | 1401.62           | 709.83  | T         | 877.46  | 859.45             | 860.44            | 439.23  | 9  |
| 15 | 1505.68 | 1487.67            | 1488.66           | 753.34  | S         | 776.41  | 758.40             | 759.39            | 388.71  | 8  |
| 16 | 1562.70 | 1544.69            | 1545.68           | 781.85  | G         | 689.38  | 671.37             | 672.36            | 345.19  | 7  |
| 17 | 1659.76 | 1641.75            | 1642.73           | 830.38  | P         | 632.36  | 614.35             | 615.33            | 316.68  | 6  |
| 18 | 1758.81 | 1740.82            | 1741.80           | 879.91  | V         | 535.31  | 517.30             | 518.28            | 268.15  | 5  |
| 19 | 1859.86 | 1841.86            | 1842.85           | 930.44  | T         | 436.24  | 418.23             | 419.23            | 218.62  | 4  |
| 20 | 1960.90 | 1942.91            | 1943.89           | 980.96  | T         | 335.19  | 317.18             | 318.17            | 168.10  | 3  |
| 21 | 2047.95 | 2029.94            | 2030.93           | 1024.48 | S         | 234.14  | 216.13             | 217.12            | 117.57  | 2  |
| 22 |         |                    |                   |         | K         | 147.11  | 129.10             | 130.09            | 74.06   | 1  |

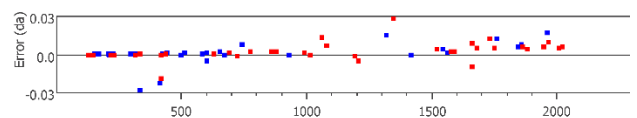

### K1246-acetyl, Htt from mouse brain

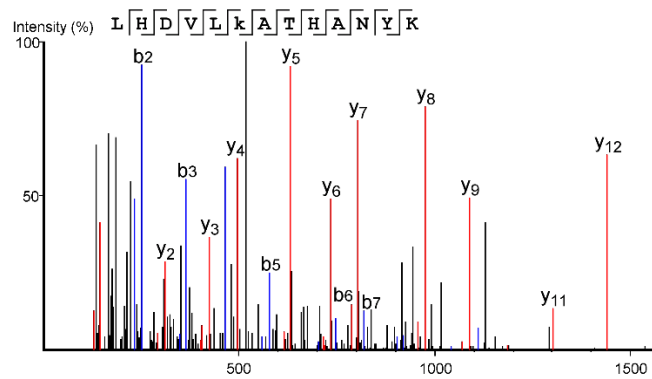

| #  | b       | b-H2O   | b-NH3   | b (2+) | Seq       | y       | y-H2O   | y-NH3   | y (2+) | #  |
|----|---------|---------|---------|--------|-----------|---------|---------|---------|--------|----|
| 1  | 114.09  | 96.08   | 97.06   | 57.55  | L         |         |         |         |        | 13 |
| 2  | 251.15  | 233.14  | 234.12  | 126.08 | H         | 1438.74 | 1420.73 | 1421.72 | 719.87 | 12 |
| 3  | 366.18  | 348.17  | 349.15  | 183.59 | D         | 1301.67 | 1283.67 | 1284.66 | 651.34 | 11 |
| 4  | 465.24  | 447.24  | 448.22  | 233.12 | V         | 1186.66 | 1168.65 | 1169.63 | 593.83 | 10 |
| 5  | 578.33  | 560.32  | 561.30  | 289.67 | L         | 1087.59 | 1069.58 | 1070.57 | 544.29 | 9  |
| 6  | 748.43  | 730.43  | 731.41  | 374.72 | K(+42.01) | 974.50  | 956.49  | 957.48  | 487.75 | 8  |
| 7  | 819.47  | 801.46  | 802.45  | 410.24 | A         | 804.40  | 786.39  | 787.37  | 402.70 | 7  |
| 8  | 920.52  | 902.50  | 903.51  | 460.76 | T         | 733.36  | 715.35  | 716.33  | 367.18 | 6  |
| 9  | 1057.58 | 1039.57 | 1040.55 | 529.29 | H         | 632.31  | 614.30  | 615.28  | 316.66 | 5  |
| 10 | 1128.62 | 1110.61 | 1111.57 | 564.81 | A         | 495.25  | 477.25  | 478.23  | 248.13 | 4  |
| 11 | 1242.66 | 1224.65 | 1225.63 | 621.83 | N         | 424.21  | 406.18  | 407.19  | 212.61 | 3  |
| 12 | 1405.72 | 1387.71 | 1388.70 | 703.36 | Y         | 310.18  | 292.14  | 293.15  | 155.59 | 2  |
| 13 |         |         |         |        | K         | 147.11  | 129.10  | 130.09  | 74.06  | 1  |

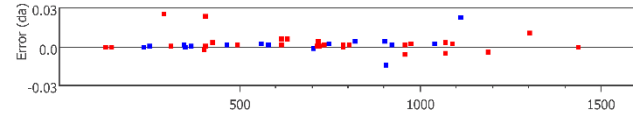

### K1246-acetyl, hu Htt from HEK293

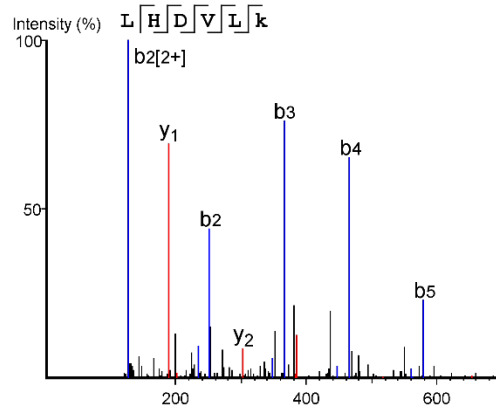

| # | b      | b-H2O  | b-NH3  | b (2+) | Seq       | y      | y-H2O  | y-NH3  | y (2+) | # |
|---|--------|--------|--------|--------|-----------|--------|--------|--------|--------|---|
| 1 | 114.09 | 96.08  | 97.06  | 57.55  | L         |        |        |        |        | 6 |
| 2 | 251.15 | 233.14 | 234.12 | 126.09 | H         | 653.36 | 635.35 | 636.33 | 327.18 | 5 |
| 3 | 366.18 | 348.17 | 349.15 | 183.59 | D         | 516.30 | 498.29 | 499.28 | 258.65 | 4 |
| 4 | 465.25 | 447.23 | 448.22 | 233.12 | V         | 401.28 | 383.28 | 384.26 | 201.12 | 3 |
| 5 | 578.33 | 560.32 | 561.32 | 289.67 | L         | 302.21 | 284.20 | 285.18 | 151.60 | 2 |
| 6 |        |        |        |        | K(+42.01) | 189.12 | 171.11 | 172.10 | 95.06  | 1 |

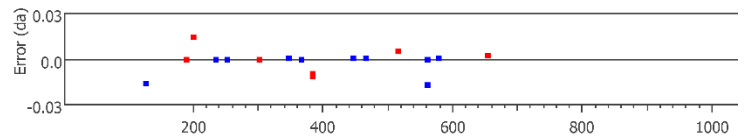

### S1864-phospho, Htt from mouse brain

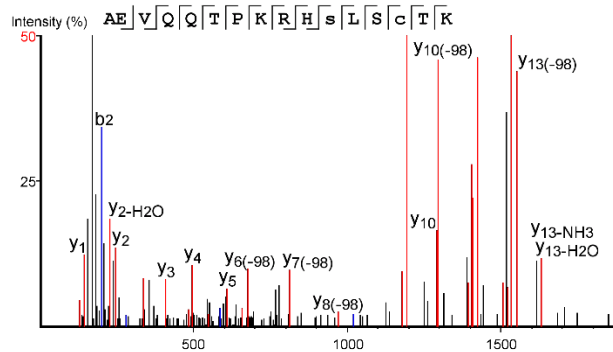

| #  | b             | b-H <sub>2</sub> O | b-NH <sub>3</sub> | b (2+)        | Seq       | y              | y-H <sub>2</sub> O | y-NH <sub>3</sub> | y (2+) | #  |
|----|---------------|--------------------|-------------------|---------------|-----------|----------------|--------------------|-------------------|--------|----|
| 1  | 72.04         | 54.03              | 55.02             | 36.52         | A         |                |                    |                   |        | 16 |
| 2  | <b>201.09</b> | 183.08             | 184.06            | 101.04        | E         | 1878.89        | 1860.88            | 1861.86           | 939.94 | 15 |
| 3  | 300.16        | <b>282.15</b>      | 283.13            | 150.58        | V         | 1749.85        | 1731.84            | 1732.82           | 875.42 | 14 |
| 4  | 428.21        | 410.20             | 411.19            | 214.61        | Q         | 1650.78        | <b>1632.75</b>     | <b>1633.74</b>    | 825.89 | 13 |
| 5  | 556.27        | 538.26             | 539.25            | 278.64        | Q         | <b>1522.71</b> | 1504.71            | <b>1505.68</b>    | 761.86 | 12 |
| 6  | 657.32        | 639.31             | 640.29            | 329.16        | T         | <b>1394.66</b> | 1376.65            | 1377.63           | 697.83 | 11 |
| 7  | 754.37        | 736.36             | 737.35            | 377.69        | P         | <b>1293.61</b> | 1275.60            | 1276.59           | 647.31 | 10 |
| 8  | 882.47        | 864.46             | 865.44            | 441.73        | K         | 1196.56        | 1178.55            | 1179.53           | 598.78 | 9  |
| 9  | 1038.57       | 1020.56            | <b>1021.54</b>    | 519.78        | R         | 1068.47        | 1050.46            | 1051.44           | 534.73 | 8  |
| 10 | 1175.63       | 1157.62            | 1158.60           | <b>588.32</b> | H         | 912.36         | 894.35             | 895.34            | 456.68 | 7  |
| 11 | 1342.63       | 1324.62            | 1325.60           | 671.81        | S(+79.97) | 775.31         | 757.29             | 758.28            | 388.15 | 6  |
| 12 | 1455.71       | 1437.70            | 1438.68           | 728.36        | L         | <b>608.31</b>  | 590.30             | 591.28            | 304.65 | 5  |
| 13 | 1542.74       | 1524.73            | 1525.72           | 771.87        | S         | <b>495.22</b>  | 477.21             | 478.20            | 248.11 | 4  |
| 14 | 1702.77       | 1684.76            | 1685.75           | 851.89        | C(+57.02) | <b>408.19</b>  | 390.18             | 391.16            | 204.60 | 3  |
| 15 | 1803.82       | 1785.81            | 1786.79           | 902.41        | T         | <b>248.16</b>  | <b>230.15</b>      | 231.13            | 124.58 | 2  |
| 16 |               |                    |                   |               | K         | <b>147.11</b>  | 129.10             | <b>130.08</b>     | 74.06  | 1  |

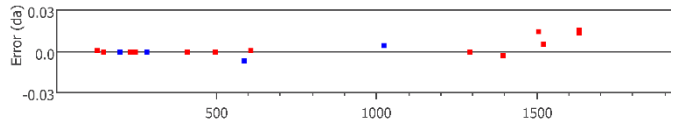

### S1864-phospho, Htt from human brain

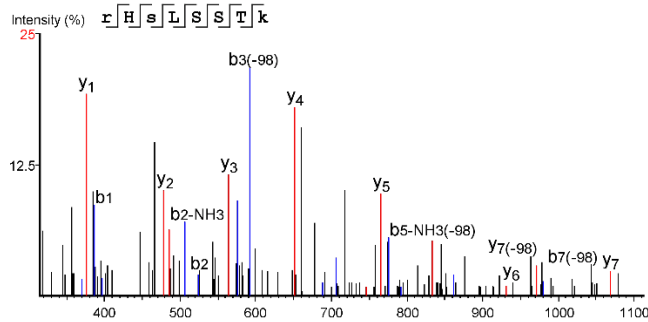

| # | Immonium | b             | b-H <sub>2</sub> O | b-NH <sub>3</sub> | b (2+)        | Seq        | y              | y-H <sub>2</sub> O | y-NH <sub>3</sub> | y (2+) | # |
|---|----------|---------------|--------------------|-------------------|---------------|------------|----------------|--------------------|-------------------|--------|---|
| 1 | 358.28   | <b>386.27</b> | 368.26             | <b>369.24</b>     | 193.64        | R(+229.16) |                |                    |                   |        | 8 |
| 2 | 110.07   | <b>523.33</b> | 505.32             | <b>506.30</b>     | <b>262.17</b> | H          | <b>1068.52</b> | 1050.52            | 1051.50           | 534.76 | 7 |
| 3 | 140.01   | 690.33        | 672.32             | 673.30            | 345.66        | S(+79.97)  | <b>931.47</b>  | 913.46             | 914.44            | 466.23 | 6 |
| 4 | 86.10    | 803.41        | 785.40             | 786.39            | 402.21        | L          | <b>764.47</b>  | <b>746.46</b>      | 747.44            | 382.74 | 5 |
| 5 | 60.04    | 890.45        | 872.43             | 873.42            | 445.72        | S          | <b>651.39</b>  | 633.38             | 634.36            | 326.19 | 4 |
| 6 | 60.04    | 977.48        | 959.47             | 960.45            | 489.24        | S          | <b>564.36</b>  | 546.34             | 547.33            | 282.68 | 3 |
| 7 | 74.06    | 1078.52       | 1060.51            | 1061.50           | 539.76        | T          | <b>477.32</b>  | 459.31             | 460.30            | 239.16 | 2 |
| 8 | 330.27   |               |                    |                   |               | K(+229.16) | <b>376.28</b>  | 358.27             | 359.25            | 188.64 | 1 |

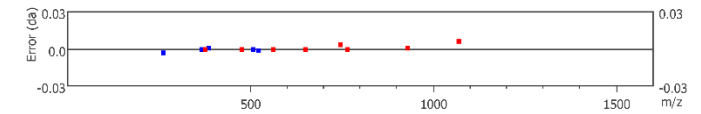

### S1866-phospho, Htt from mouse brain

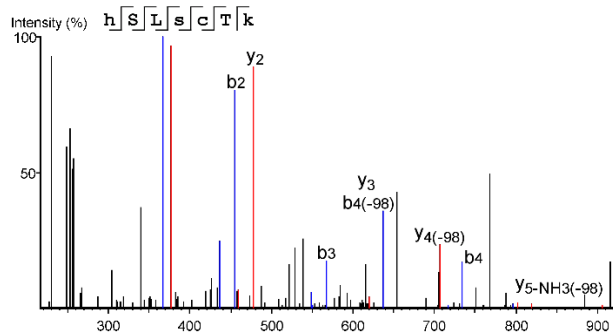

| # | b             | b-H <sub>2</sub> O | b-NH <sub>3</sub> | b (2+) | Seq        | y             | y-H <sub>2</sub> O | y-NH <sub>3</sub> | y (2+) | # |
|---|---------------|--------------------|-------------------|--------|------------|---------------|--------------------|-------------------|--------|---|
| 1 | <b>367.23</b> | 349.22             | 350.20            | 184.11 | H(+229.16) |               |                    |                   |        | 7 |
| 2 | <b>454.26</b> | <b>436.25</b>      | 437.23            | 227.63 | S          | 1004.47       | 986.46             | 987.44            | 502.73 | 6 |
| 3 | <b>567.35</b> | <b>549.33</b>      | <b>550.29</b>     | 284.17 | L          | 917.44        | 899.43             | 900.41            | 459.22 | 5 |
| 4 | <b>734.37</b> | <b>716.36</b>      | 717.32            | 367.67 | S(+79.97)  | 804.35        | 786.34             | 787.33            | 402.68 | 4 |
| 5 | 894.37        | 876.36             | 877.35            | 447.69 | C(+57.02)  | <b>637.36</b> | 619.34             | <b>620.33</b>     | 319.18 | 3 |
| 6 | 995.42        | 977.41             | 978.40            | 498.21 | T          | <b>477.32</b> | <b>459.31</b>      | 460.30            | 239.16 | 2 |
| 7 |               |                    |                   |        | K(+229.16) | <b>376.28</b> | 358.27             | 359.25            | 188.64 | 1 |

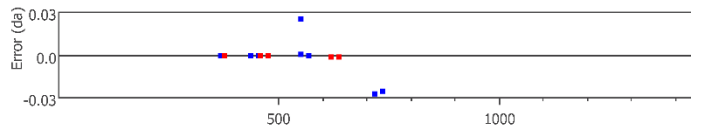



S1866-phospho, hu Htt from HEK293

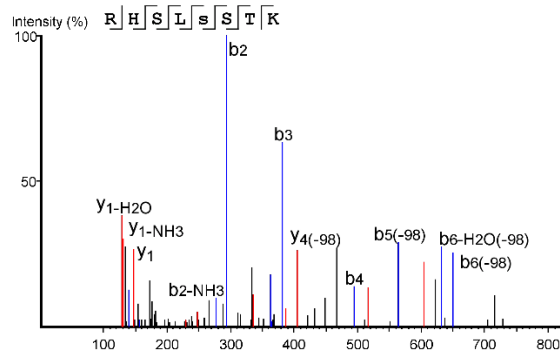

| # | b             | b-H2O         | b-NH3         | b (2+)        | Seq        | y             | y-H2O         | y-NH3         | y (2+)        | # |
|---|---------------|---------------|---------------|---------------|------------|---------------|---------------|---------------|---------------|---|
| 1 | <b>157.11</b> | <b>139.10</b> | <b>140.08</b> | <b>79.05</b>  | R          |               |               |               |               | 8 |
| 2 | <b>294.17</b> | <b>276.16</b> | <b>277.14</b> | <b>147.58</b> | H          | 839.37        | 821.36        | 822.34        | 420.18        | 7 |
| 3 | <b>381.20</b> | <b>363.19</b> | <b>364.17</b> | <b>191.10</b> | S          | 702.31        | 684.30        | 685.28        | 351.65        | 6 |
| 4 | <b>494.28</b> | <b>476.27</b> | <b>477.26</b> | <b>247.64</b> | L          | 615.27        | 597.26        | 598.25        | 308.14        | 5 |
| 5 | <b>661.28</b> | <b>643.27</b> | <b>644.26</b> | <b>331.14</b> | S (+79.97) | 502.19        | 484.18        | 485.16        | 251.60        | 4 |
| 6 | <b>748.31</b> | <b>730.30</b> | <b>731.29</b> | <b>374.66</b> | S          | <b>335.19</b> | <b>317.18</b> | <b>318.17</b> | <b>168.10</b> | 3 |
| 7 | <b>849.36</b> | <b>831.35</b> | <b>832.34</b> | <b>425.18</b> | T          | <b>248.16</b> | <b>230.15</b> | <b>231.13</b> | <b>124.58</b> | 2 |
| 8 |               |               |               |               | K          | <b>147.11</b> | <b>129.10</b> | <b>130.09</b> | <b>74.06</b>  | 1 |

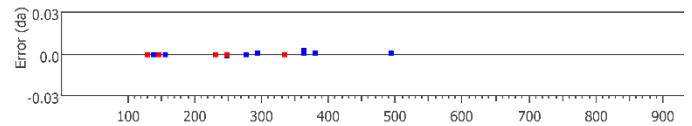

S1872-phospho, hu Htt from HEK293

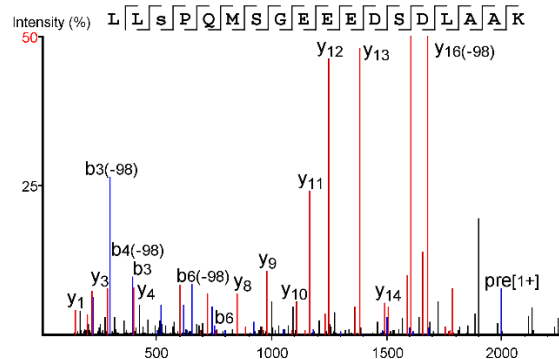

| #  | b       | b-H2O   | b-NH3   | b (2+) | Seq       | y       | y-H2O   | y-NH3   | y (2+) | #  |
|----|---------|---------|---------|--------|-----------|---------|---------|---------|--------|----|
| 1  | 114.09  | 96.08   | 97.06   | 57.55  | L         |         |         |         |        | 18 |
| 2  | 227.17  | 209.17  | 210.15  | 114.09 | L         | 1886.77 | 1868.76 | 1869.75 | 943.89 | 17 |
| 3  | 394.17  | 376.16  | 377.15  | 197.59 | S(+79.97) | 1773.69 | 1755.67 | 1756.66 | 887.34 | 16 |
| 4  | 491.23  | 473.22  | 474.20  | 246.11 | P         | 1606.69 | 1588.67 | 1589.67 | 803.85 | 15 |
| 5  | 619.28  | 601.28  | 602.26  | 310.14 | Q         | 1509.63 | 1491.63 | 1492.61 | 755.32 | 14 |
| 6  | 750.32  | 732.32  | 733.30  | 375.66 | M         | 1381.58 | 1363.56 | 1364.55 | 691.29 | 13 |
| 7  | 837.36  | 819.35  | 820.33  | 419.18 | S         | 1250.54 | 1232.53 | 1233.51 | 625.77 | 12 |
| 8  | 894.38  | 876.37  | 877.35  | 447.69 | G         | 1163.51 | 1145.49 | 1146.48 | 582.25 | 11 |
| 9  | 1023.42 | 1005.41 | 1006.40 | 512.21 | E         | 1106.48 | 1088.47 | 1089.46 | 553.74 | 10 |
| 10 | 1152.46 | 1134.45 | 1135.44 | 576.73 | E         | 977.44  | 959.43  | 960.42  | 489.22 | 9  |
| 11 | 1281.51 | 1263.50 | 1264.48 | 641.25 | E         | 848.40  | 830.39  | 831.37  | 424.70 | 8  |
| 12 | 1396.53 | 1378.52 | 1379.51 | 698.77 | D         | 719.36  | 701.35  | 702.33  | 360.18 | 7  |
| 13 | 1483.59 | 1465.56 | 1466.54 | 742.29 | S         | 604.33  | 586.32  | 587.30  | 302.67 | 6  |
| 14 | 1598.59 | 1580.58 | 1581.57 | 799.80 | D         | 517.30  | 499.29  | 500.27  | 259.15 | 5  |
| 15 | 1711.68 | 1693.67 | 1694.65 | 856.34 | L         | 402.27  | 384.26  | 385.24  | 201.64 | 4  |
| 16 | 1782.71 | 1764.70 | 1765.69 | 891.86 | A         | 289.19  | 271.18  | 272.16  | 145.09 | 3  |
| 17 | 1853.75 | 1835.74 | 1836.72 | 927.38 | A         | 218.15  | 200.14  | 201.12  | 109.57 | 2  |
| 18 |         |         |         |        | K         | 147.11  | 129.10  | 130.09  | 74.06  | 1  |

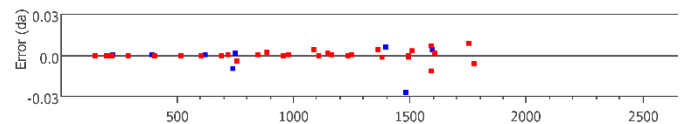

K1875-acetyl, S1876-phospho, Htt from mouse brain

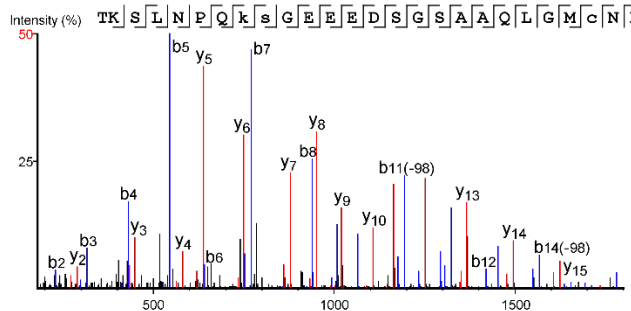

| #  | b       | b-H2O   | b-NH3   | b (2+)  | Seq               | y       | y-H2O   | y-NH3   | y (2+)  | #  |
|----|---------|---------|---------|---------|-------------------|---------|---------|---------|---------|----|
| 1  | 102.06  | 84.04   | 85.03   | 51.53   | T                 |         |         |         |         | 26 |
| 2  | 230.17  | 212.14  | 213.12  | 115.58  | K                 | 2815.24 | 2797.23 | 2798.21 | 1408.12 | 25 |
| 3  | 317.20  | 299.17  | 300.16  | 159.08  | S                 | 2687.14 | 2669.13 | 2670.12 | 1344.07 | 24 |
| 4  | 430.29  | 412.27  | 413.24  | 215.63  | L                 | 2600.11 | 2582.10 | 2583.08 | 1300.56 | 23 |
| 5  | 544.33  | 526.32  | 527.28  | 272.65  | N                 | 2487.03 | 2469.02 | 2470.00 | 1244.01 | 22 |
| 6  | 641.38  | 623.35  | 624.31  | 321.18  | P                 | 2372.98 | 2354.97 | 2355.96 | 1186.99 | 21 |
| 7  | 769.44  | 751.41  | 752.41  | 385.21  | Q                 | 2275.93 | 2257.92 | 2258.90 | 1138.47 | 20 |
| 8  | 939.55  | 921.55  | 922.52  | 470.28  | K(+42.05) 2147.73 |         | 2129.86 | 2130.85 | 1074.44 | 19 |
| 9  | 1106.56 | 1088.55 | 1089.53 | 553.78  | S(+79.97) 1977.73 |         | 1957.72 | 1960.70 | 989.38  | 18 |
| 10 | 1163.58 | 1145.57 | 1146.56 | 582.29  | G                 | 1810.73 | 1792.72 | 1793.71 | 905.87  | 17 |
| 11 | 1292.61 | 1274.61 | 1275.60 | 646.81  | E                 | 1753.71 | 1735.70 | 1736.71 | 877.36  | 16 |
| 12 | 1421.65 | 1403.66 | 1404.64 | 711.33  | E                 | 1624.67 | 1606.66 | 1607.65 | 812.83  | 15 |
| 13 | 1550.70 | 1532.70 | 1533.68 | 775.86  | E                 | 1495.63 | 1477.61 | 1478.61 | 748.31  | 14 |
| 14 | 1665.74 | 1647.73 | 1648.71 | 833.37  | D                 | 1366.58 | 1348.57 | 1349.56 | 683.79  | 13 |
| 15 | 1752.77 | 1734.76 | 1735.74 | 876.88  | S                 | 1251.56 | 1233.54 | 1234.54 | 626.28  | 12 |
| 16 | 1809.79 | 1791.78 | 1792.76 | 905.40  | G                 | 1164.52 | 1146.51 | 1147.50 | 582.76  | 11 |
| 17 | 1896.82 | 1878.81 | 1879.80 | 948.91  | S                 | 1107.50 | 1089.49 | 1090.47 | 554.25  | 10 |
| 18 | 1967.86 | 1949.85 | 1950.83 | 984.93  | A                 | 1020.47 | 1002.46 | 1003.44 | 510.74  | 9  |
| 19 | 2038.90 | 2020.89 | 2021.87 | 1019.45 | A                 | 949.43  | 931.42  | 932.41  | 475.22  | 8  |
| 20 | 2166.96 | 2148.95 | 2149.93 | 1083.98 | Q                 | 878.40  | 860.39  | 861.37  | 439.70  | 7  |
| 21 | 2280.04 | 2262.03 | 2263.01 | 1140.52 | L                 | 750.34  | 732.33  | 733.31  | 375.67  | 6  |
| 22 | 2337.06 | 2319.05 | 2320.03 | 1169.03 | G                 | 637.25  | 619.24  | 620.23  | 319.13  | 5  |
| 23 | 2468.10 | 2450.09 | 2451.07 | 1234.54 | M                 | 580.23  | 562.22  | 563.21  | 290.62  | 4  |
| 24 | 2628.13 | 2610.12 | 2611.11 | 1314.57 | C(+57.02) 449.19  |         | 431.18  | 432.17  | 225.10  | 3  |
| 25 | 2742.18 | 2724.16 | 2725.15 | 1371.59 | N                 | 289.16  | 271.14  | 272.13  | 145.06  | 2  |
| 26 |         |         |         |         | R                 | 175.12  | 157.11  | 158.09  | 88.06   | 1  |

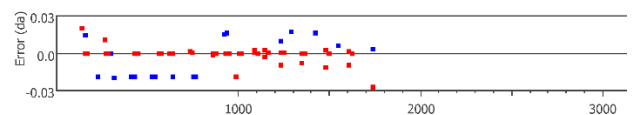



### S1876-phospho, Htt from mouse brain

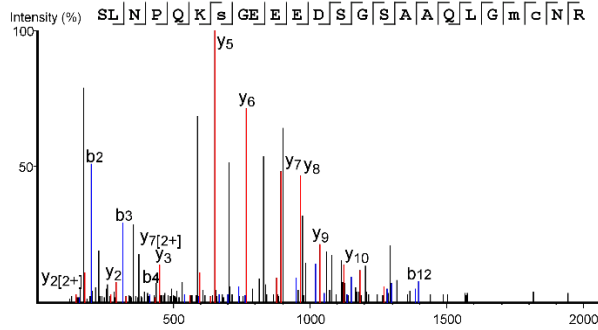

| #  | b       | b-H2O   | b-NH3   | b (2+)  | Seq       | y       | y-H2O   | y-NH3   | y (2+)  | #  |
|----|---------|---------|---------|---------|-----------|---------|---------|---------|---------|----|
| 1  | 88.04   | 70.03   | 71.01   | 44.52   | S         |         |         |         |         | 24 |
| 2  | 201.12  | 183.11  | 184.10  | 101.06  | L         | 2574.06 | 2556.05 | 2557.03 | 1287.53 | 23 |
| 3  | 315.17  | 297.16  | 298.14  | 158.09  | N         | 2460.98 | 2442.97 | 2443.95 | 1230.99 | 22 |
| 4  | 412.22  | 394.21  | 395.19  | 206.61  | P         | 2346.93 | 2328.92 | 2329.91 | 1173.97 | 21 |
| 5  | 540.28  | 522.27  | 523.25  | 270.64  | Q         | 2249.88 | 2231.87 | 2232.85 | 1125.44 | 20 |
| 6  | 668.37  | 650.36  | 651.35  | 334.69  | K         | 2121.82 | 2103.81 | 2104.79 | 1061.41 | 19 |
| 7  | 835.37  | 817.36  | 818.34  | 418.19  | S(+79.97) | 1993.73 | 1975.72 | 1976.70 | 997.36  | 18 |
| 8  | 892.39  | 874.38  | 875.37  | 446.70  | G         | 1826.73 | 1808.72 | 1809.70 | 913.86  | 17 |
| 9  | 1021.43 | 1003.42 | 1004.41 | 511.22  | E         | 1769.71 | 1751.70 | 1752.68 | 885.35  | 16 |
| 10 | 1150.48 | 1132.47 | 1133.45 | 575.74  | E         | 1640.66 | 1622.65 | 1623.64 | 820.83  | 15 |
| 11 | 1279.53 | 1261.51 | 1262.49 | 640.26  | E         | 1511.62 | 1493.61 | 1494.59 | 756.31  | 14 |
| 12 | 1394.53 | 1376.54 | 1377.52 | 697.78  | D         | 1382.58 | 1364.57 | 1365.55 | 691.79  | 13 |
| 13 | 1481.58 | 1463.57 | 1464.55 | 741.29  | S         | 1267.55 | 1249.54 | 1250.52 | 634.28  | 12 |
| 14 | 1538.60 | 1520.59 | 1521.57 | 769.80  | G         | 1180.52 | 1162.51 | 1163.49 | 590.76  | 11 |
| 15 | 1625.63 | 1607.62 | 1608.61 | 813.32  | S         | 1123.50 | 1105.49 | 1106.47 | 562.22  | 10 |
| 16 | 1696.67 | 1678.66 | 1679.64 | 848.84  | A         | 1036.47 | 1018.46 | 1019.44 | 518.73  | 9  |
| 17 | 1767.71 | 1749.70 | 1750.68 | 884.35  | A         | 965.43  | 947.42  | 948.40  | 483.21  | 8  |
| 18 | 1895.77 | 1877.76 | 1878.74 | 948.40  | Q         | 894.39  | 876.38  | 877.36  | 447.70  | 7  |
| 19 | 2008.85 | 1990.84 | 1991.82 | 1004.92 | L         | 766.33  | 748.32  | 749.31  | 383.67  | 6  |
| 20 | 2065.87 | 2047.86 | 2048.84 | 1033.44 | G         | 653.25  | 635.24  | 636.23  | 327.12  | 5  |
| 21 | 2212.91 | 2194.90 | 2195.88 | 1106.95 | M(+15.99) | 596.23  | 578.22  | 579.20  | 298.61  | 4  |
| 22 | 2372.94 | 2354.93 | 2355.91 | 1186.97 | C(+57.02) | 449.19  | 431.18  | 432.17  | 225.10  | 3  |
| 23 | 2486.98 | 2468.97 | 2469.95 | 1243.99 | N         | 289.16  | 271.14  | 272.13  | 145.06  | 2  |
| 24 |         |         |         |         | R         | 175.12  | 157.11  | 158.09  | 88.06   | 1  |

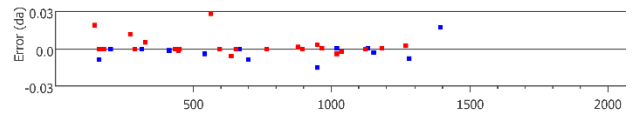

### S1876-phospho, Htt from human brain

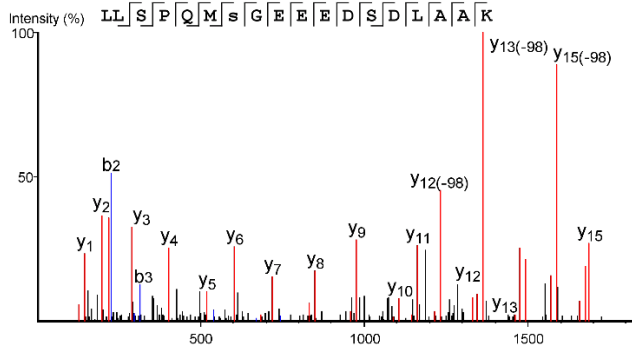

| #  | Immonium | b       | b-H2O   | b-NH3   | b (2+) | Seq       | y       | y-H2O   | y-NH3   | y (2+) | #  |
|----|----------|---------|---------|---------|--------|-----------|---------|---------|---------|--------|----|
| 1  | 86.10    | 114.09  | 96.08   | 97.06   | 57.55  | L         |         |         |         |        | 18 |
| 2  | 86.10    | 227.18  | 209.17  | 210.15  | 114.09 | L         | 1886.77 | 1868.76 | 1869.75 | 943.89 | 17 |
| 3  | 60.04    | 314.21  | 296.20  | 297.18  | 157.60 | S         | 1773.69 | 1755.68 | 1756.66 | 887.34 | 16 |
| 4  | 70.07    | 411.26  | 393.25  | 394.23  | 206.13 | P         | 1686.67 | 1668.65 | 1669.63 | 843.83 | 15 |
| 5  | 101.07   | 539.31  | 521.31  | 522.29  | 270.16 | Q         | 1589.60 | 1571.59 | 1572.58 | 795.30 | 14 |
| 6  | 104.05   | 670.36  | 652.35  | 653.33  | 335.68 | M         | 1461.54 | 1443.53 | 1444.52 | 731.27 | 13 |
| 7  | 140.01   | 837.36  | 819.35  | 820.33  | 419.18 | S(+79.97) | 1330.51 | 1312.49 | 1313.48 | 665.75 | 12 |
| 8  | 30.03    | 894.38  | 876.37  | 877.35  | 447.69 | G         | 1163.50 | 1145.48 | 1146.48 | 582.25 | 11 |
| 9  | 102.06   | 1023.42 | 1005.41 | 1006.40 | 512.21 | E         | 1106.49 | 1088.47 | 1089.46 | 553.74 | 10 |
| 10 | 102.06   | 1152.46 | 1134.45 | 1135.44 | 576.73 | E         | 977.45  | 959.44  | 960.42  | 489.22 | 9  |
| 11 | 102.06   | 1281.51 | 1263.50 | 1264.48 | 641.25 | E         | 848.40  | 830.40  | 831.37  | 424.70 | 8  |
| 12 | 88.04    | 1396.53 | 1378.52 | 1379.51 | 698.77 | D         | 719.36  | 701.35  | 702.33  | 360.18 | 7  |
| 13 | 60.04    | 1483.57 | 1465.56 | 1466.54 | 742.31 | S         | 604.33  | 586.32  | 587.30  | 302.67 | 6  |
| 14 | 88.04    | 1598.59 | 1580.58 | 1581.57 | 799.80 | D         | 517.30  | 499.29  | 500.27  | 259.15 | 5  |
| 15 | 86.10    | 1711.68 | 1693.67 | 1694.65 | 856.34 | L         | 402.27  | 384.26  | 385.24  | 201.64 | 4  |
| 16 | 44.05    | 1782.71 | 1764.70 | 1765.69 | 891.86 | A         | 289.19  | 271.18  | 272.16  | 145.09 | 3  |
| 17 | 44.05    | 1853.75 | 1835.74 | 1836.72 | 927.38 | A         | 218.15  | 200.14  | 201.12  | 109.57 | 2  |
| 18 | 101.11   |         |         |         |        | K         | 147.11  | 129.10  | 130.09  | 74.06  | 1  |

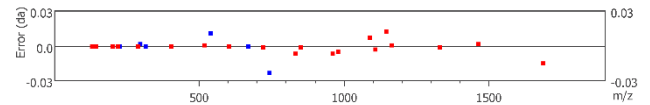

### S1882-phospho, Htt from mouse brain

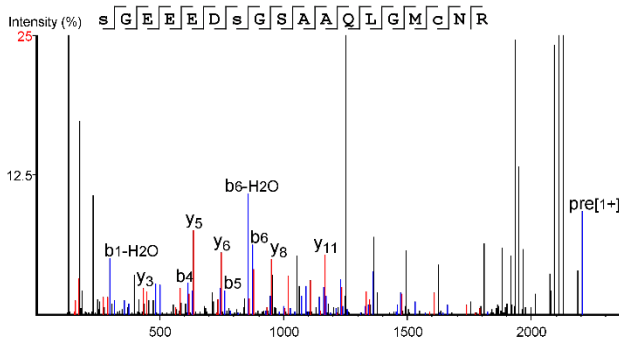

| #  | b       | b-H2O   | b-NH3   | b (2+)  | Seq        | y       | y-H2O   | y-NH3   | y (2+) | #  |
|----|---------|---------|---------|---------|------------|---------|---------|---------|--------|----|
| 1  | 317.20  | 299.19  | 300.18  | 159.10  | S(+229.16) |         |         |         |        | 18 |
| 2  | 374.22  | 356.21  | 357.20  | 187.61  | G          | 1890.70 | 1872.69 | 1873.67 | 945.85 | 17 |
| 3  | 503.27  | 485.26  | 486.24  | 252.13  | E          | 1833.68 | 1815.67 | 1816.65 | 917.34 | 16 |
| 4  | 632.31  | 614.30  | 615.28  | 316.65  | E          | 1704.64 | 1686.62 | 1687.61 | 852.82 | 15 |
| 5  | 761.35  | 743.34  | 744.33  | 381.18  | E          | 1575.59 | 1557.58 | 1558.57 | 788.30 | 14 |
| 6  | 876.38  | 858.37  | 859.35  | 438.69  | D          | 1446.55 | 1428.54 | 1429.52 | 723.78 | 13 |
| 7  | 1043.37 | 1025.36 | 1026.35 | 522.19  | S(+79.97)  | 1331.52 | 1313.51 | 1314.50 | 666.26 | 12 |
| 8  | 1100.39 | 1082.39 | 1083.37 | 550.70  | G          | 1164.52 | 1146.51 | 1147.51 | 582.76 | 11 |
| 9  | 1187.43 | 1169.42 | 1170.40 | 594.22  | S          | 1107.50 | 1089.49 | 1090.48 | 554.25 | 10 |
| 10 | 1258.47 | 1240.45 | 1241.44 | 629.73  | A          | 1020.47 | 1002.46 | 1003.44 | 510.74 | 9  |
| 11 | 1329.50 | 1311.50 | 1312.48 | 665.25  | A          | 949.43  | 931.42  | 932.41  | 475.22 | 8  |
| 12 | 1457.56 | 1439.55 | 1440.54 | 729.28  | Q          | 878.40  | 860.39  | 861.37  | 439.70 | 7  |
| 13 | 1570.65 | 1552.64 | 1553.62 | 785.83  | L          | 750.34  | 732.32  | 733.30  | 375.67 | 6  |
| 14 | 1627.65 | 1609.66 | 1610.64 | 814.33  | G          | 637.25  | 619.24  | 620.23  | 319.13 | 5  |
| 15 | 1758.71 | 1740.70 | 1741.68 | 879.85  | M          | 580.23  | 562.22  | 563.21  | 290.62 | 4  |
| 16 | 1918.74 | 1900.73 | 1901.71 | 959.87  | C(+57.02)  | 449.19  | 431.18  | 432.17  | 225.10 | 3  |
| 17 | 2032.78 | 2014.77 | 2015.76 | 1016.89 | N          | 289.16  | 271.14  | 272.13  | 145.08 | 2  |
| 18 |         |         |         |         | R          | 175.12  | 157.11  | 158.09  | 88.06  | 1  |

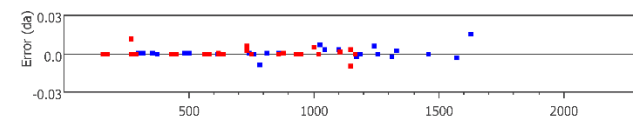

### S2114-phospho, Htt from mouse brain

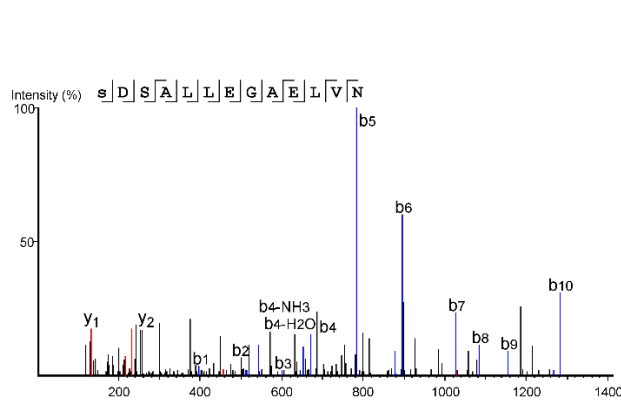

| #  | b       | b-H2O   | b-NH3   | b (2+) | Seq        | y       | y-H2O   | y-NH3   | y (2+) | #  |
|----|---------|---------|---------|--------|------------|---------|---------|---------|--------|----|
| 1  | 397.17  | 379.16  | 380.14  | 199.08 | S(+309.13) |         |         |         |        | 13 |
| 2  | 512.20  | 494.19  | 495.17  | 256.60 | D          | 1230.62 | 1212.61 | 1213.59 | 615.81 | 12 |
| 3  | 599.23  | 581.22  | 582.20  | 300.11 | S          | 1115.59 | 1097.58 | 1098.57 | 558.30 | 11 |
| 4  | 670.26  | 652.25  | 653.26  | 335.63 | A          | 1028.57 | 1010.55 | 1011.54 | 514.78 | 10 |
| 5  | 783.35  | 765.34  | 766.32  | 392.17 | L          | 957.53  | 939.51  | 940.50  | 479.26 | 9  |
| 6  | 896.43  | 878.44  | 879.43  | 448.72 | L          | 844.44  | 826.43  | 827.41  | 422.72 | 8  |
| 7  | 1025.47 | 1007.47 | 1008.45 | 513.24 | E          | 731.36  | 713.35  | 714.33  | 366.18 | 7  |
| 8  | 1082.49 | 1064.49 | 1065.47 | 541.75 | G          | 602.31  | 584.30  | 585.29  | 301.66 | 6  |
| 9  | 1153.53 | 1135.52 | 1136.51 | 577.27 | A          | 545.29  | 527.28  | 528.27  | 273.15 | 5  |
| 10 | 1282.57 | 1264.57 | 1265.56 | 641.79 | E          | 474.26  | 456.25  | 457.23  | 237.63 | 4  |
| 11 | 1395.66 | 1377.65 | 1378.63 | 698.33 | L          | 345.21  | 327.20  | 328.19  | 173.11 | 3  |
| 12 | 1494.73 | 1476.72 | 1477.70 | 747.86 | V          | 232.13  | 214.12  | 215.10  | 116.56 | 2  |
| 13 |         |         |         |        | N          | 133.06  | 115.05  | 116.03  | 67.03  | 1  |

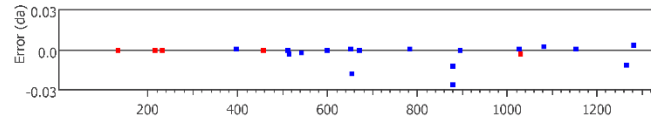

### S2116-phospho, Htt from mouse brain

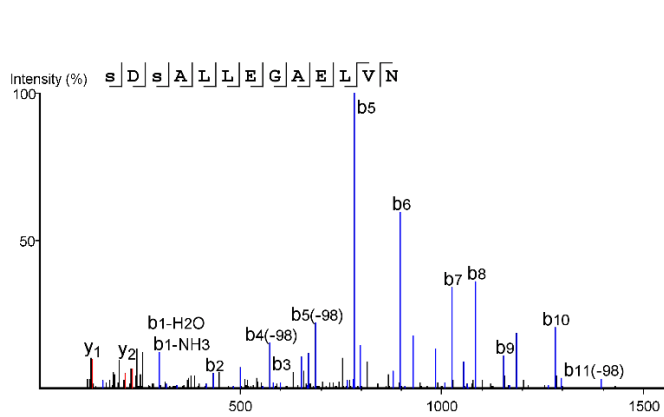

| #  | b       | b-H2O   | b-NH3   | b (2+) | Seq        | y       | y-H2O   | y-NH3   | y (2+) | #  |
|----|---------|---------|---------|--------|------------|---------|---------|---------|--------|----|
| 1  | 317.20  | 299.19  | 300.16  | 159.09 | S(+229.16) |         |         |         |        | 13 |
| 2  | 432.23  | 414.22  | 415.20  | 216.61 | D          | 1310.59 | 1292.58 | 1293.56 | 655.79 | 12 |
| 3  | 599.23  | 581.22  | 582.20  | 300.11 | S(+79.97)  | 1195.56 | 1177.55 | 1178.53 | 598.28 | 11 |
| 4  | 670.26  | 652.25  | 653.24  | 335.63 | A          | 1028.56 | 1010.55 | 1011.54 | 514.78 | 10 |
| 5  | 783.35  | 765.34  | 766.32  | 392.17 | L          | 957.53  | 939.51  | 940.50  | 479.26 | 9  |
| 6  | 896.43  | 878.44  | 879.41  | 448.72 | L          | 844.44  | 826.43  | 827.41  | 422.72 | 8  |
| 7  | 1025.47 | 1007.46 | 1008.45 | 513.24 | E          | 731.36  | 713.35  | 714.33  | 366.18 | 7  |
| 8  | 1082.50 | 1064.49 | 1065.49 | 541.75 | G          | 602.31  | 584.30  | 585.29  | 301.66 | 6  |
| 9  | 1153.53 | 1135.52 | 1136.51 | 577.27 | A          | 545.29  | 527.28  | 528.27  | 273.15 | 5  |
| 10 | 1282.58 | 1264.56 | 1265.57 | 641.79 | E          | 474.26  | 456.25  | 457.23  | 237.63 | 4  |
| 11 | 1395.66 | 1377.65 | 1378.63 | 698.33 | L          | 345.21  | 327.20  | 328.19  | 173.11 | 3  |
| 12 | 1494.73 | 1476.72 | 1477.70 | 747.86 | V          | 232.13  | 214.12  | 215.10  | 116.56 | 2  |
| 13 |         |         |         |        | N          | 133.06  | 115.05  | 116.03  | 67.03  | 1  |

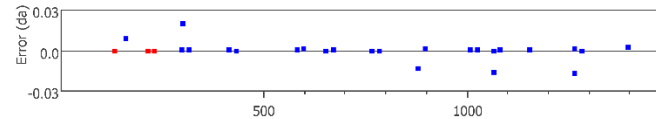

### S2116-phospho, hu Htt from HEK293

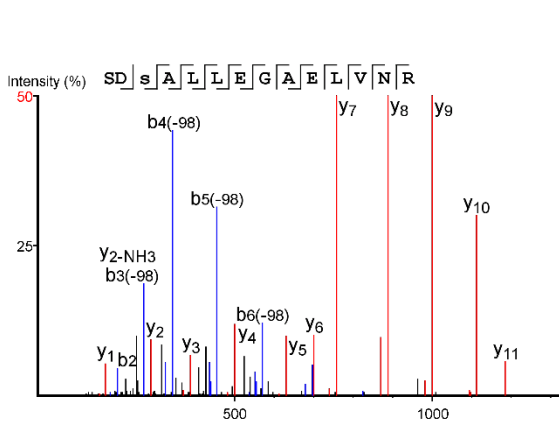

| #  | b       | b-H2O   | b-NH3   | b (2+) | Seq       | y       | y-H2O   | y-NH3   | y (2+) | #  |
|----|---------|---------|---------|--------|-----------|---------|---------|---------|--------|----|
| 1  | 88.04   | 70.03   | 71.01   | 44.52  | S         |         |         |         |        | 14 |
| 2  | 203.07  | 185.06  | 186.04  | 102.03 | D         | 1466.69 | 1448.68 | 1449.66 | 733.84 | 13 |
| 3  | 370.06  | 352.05  | 353.04  | 185.53 | S(+79.97) | 1351.66 | 1333.65 | 1334.63 | 676.33 | 12 |
| 4  | 441.10  | 423.09  | 424.08  | 221.05 | A         | 1184.66 | 1166.65 | 1167.64 | 592.83 | 11 |
| 5  | 554.19  | 536.17  | 537.16  | 277.59 | L         | 1113.62 | 1095.61 | 1096.61 | 557.31 | 10 |
| 6  | 667.27  | 649.26  | 650.24  | 334.14 | L         | 1000.54 | 982.53  | 983.52  | 500.77 | 9  |
| 7  | 796.31  | 778.30  | 779.29  | 398.66 | E         | 887.46  | 869.44  | 870.44  | 444.23 | 8  |
| 8  | 853.33  | 835.32  | 836.31  | 427.17 | G         | 758.41  | 740.40  | 741.39  | 379.71 | 7  |
| 9  | 924.37  | 906.36  | 907.34  | 462.69 | A         | 701.39  | 683.38  | 684.37  | 351.20 | 6  |
| 10 | 1053.41 | 1035.40 | 1036.39 | 527.21 | E         | 630.36  | 612.35  | 613.32  | 315.68 | 5  |
| 11 | 1166.50 | 1148.49 | 1149.47 | 583.75 | L         | 501.31  | 483.30  | 484.29  | 251.16 | 4  |
| 12 | 1265.57 | 1247.56 | 1248.54 | 633.28 | V         | 388.23  | 370.22  | 371.19  | 194.62 | 3  |
| 13 | 1379.61 | 1361.60 | 1362.58 | 690.30 | N         | 289.16  | 271.15  | 272.13  | 145.08 | 2  |
| 14 |         |         |         |        | R         | 175.12  | 157.11  | 158.09  | 88.06  | 1  |

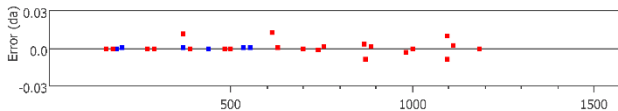

## S2330-phospho, Htt from human brain

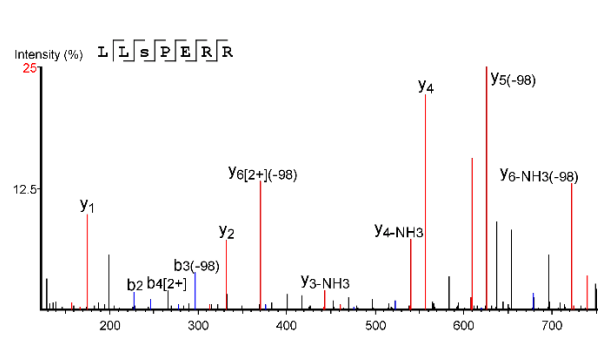

| # | b             | b-H2O  | b-NH3  | b (2+)        | Seq       | y             | y-H2O         | y-NH3         | y (2+)        | # |
|---|---------------|--------|--------|---------------|-----------|---------------|---------------|---------------|---------------|---|
| 1 | 114.09        | 96.08  | 97.06  | 57.55         | L         |               |               |               |               | 7 |
| 2 | <b>227.18</b> | 209.17 | 210.15 | 114.09        | L         | 837.40        | 819.39        | 820.37        | 419.20        | 6 |
| 3 | 394.17        | 376.16 | 377.15 | 197.59        | S(+79.97) | <b>724.34</b> | 706.30        | 707.29        | 362.66        | 5 |
| 4 | 491.23        | 473.22 | 474.20 | <b>246.13</b> | P         | <b>557.32</b> | <b>539.31</b> | <b>540.29</b> | 279.16        | 4 |
| 5 | <b>620.27</b> | 602.26 | 603.24 | 310.63        | E         | <b>460.26</b> | <b>442.25</b> | <b>443.24</b> | 230.63        | 3 |
| 6 | 776.37        | 758.36 | 759.34 | 388.69        | R         | <b>331.22</b> | <b>313.21</b> | 314.19        | <b>166.09</b> | 2 |
| 7 |               |        |        |               | R         | <b>175.12</b> | <b>157.11</b> | 158.09        | 88.06         | 1 |

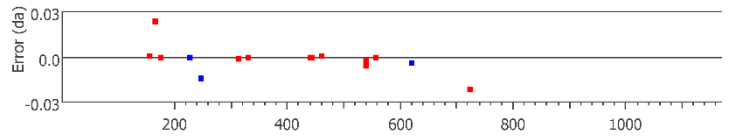

## S2489-phospho, Htt from mouse brain

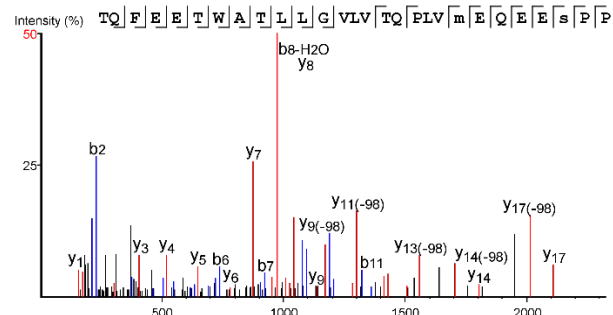

| #  | b              | b-H2O          | b-NH3          | b (2+)        | Seq       | y              | y-H2O         | y-NH3          | y (2+)         | #  |
|----|----------------|----------------|----------------|---------------|-----------|----------------|---------------|----------------|----------------|----|
| 1  | 102.06         | 84.04          | 85.03          | 51.53         | T         |                |               |                |                | 34 |
| 2  | <b>230.11</b>  | <b>212.10</b>  | <b>213.09</b>  | 115.56        | Q         | 3926.79        | 3908.78       | 3909.77        | 1963.90        | 33 |
| 3  | <b>377.18</b>  | 359.17         | 360.16         | 189.09        | F         | 3798.73        | 3780.72       | 3781.71        | 1899.87        | 32 |
| 4  | <b>506.22</b>  | 488.21         | 489.20         | 253.61        | E         | 3651.67        | 3633.66       | 3634.64        | 1826.33        | 31 |
| 5  | <b>635.26</b>  | <b>617.25</b>  | 618.24         | 318.13        | E         | 3522.62        | 3504.61       | 3505.60        | 1761.81        | 30 |
| 6  | <b>736.31</b>  | <b>718.30</b>  | 719.29         | 368.66        | T         | 3393.58        | 3375.57       | 3376.55        | 1697.29        | 29 |
| 7  | <b>922.38</b>  | <b>904.38</b>  | <b>905.38</b>  | <b>461.70</b> | W         | 3292.53        | 3274.52       | 3275.51        | 1646.77        | 28 |
| 8  | 993.43         | <b>975.42</b>  | 976.40         | 497.22        | A         | 3106.45        | 3088.44       | 3089.43        | 1553.73        | 27 |
| 9  | <b>1094.47</b> | <b>1076.47</b> | <b>1077.46</b> | <b>547.74</b> | T         | 3035.42        | 3017.41       | 3018.39        | 1518.21        | 26 |
| 10 | <b>1207.56</b> | <b>1189.56</b> | <b>1190.55</b> | 604.28        | L         | 2934.37        | 2916.36       | 2917.34        | 1467.68        | 25 |
| 11 | <b>1320.63</b> | 1302.64        | 1303.62        | 660.82        | L         | 2821.28        | 2803.27       | 2804.26        | 1411.14        | 24 |
| 12 | 1377.67        | 1359.66        | <b>1360.62</b> | <b>689.33</b> | G         | 2708.20        | 2690.19       | 2691.17        | 1354.60        | 23 |
| 13 | 1476.74        | 1458.73        | 1459.71        | 738.87        | V         | 2651.18        | 2633.17       | 2634.15        | 1326.09        | 22 |
| 14 | 1589.82        | 1571.81        | 1572.79        | 795.41        | L         | 2552.11        | 2534.10       | 2535.08        | 1276.56        | 21 |
| 15 | 1688.89        | 1670.88        | 1671.86        | 844.94        | V         | 2439.03        | 2421.02       | 2422.00        | 1220.01        | 20 |
| 16 | 1789.94        | 1771.93        | 1772.91        | 895.47        | T         | 2339.96        | 2321.95       | 2322.93        | <b>1170.48</b> | 19 |
| 17 | 1918.00        | 1899.99        | 1900.97        | 959.50        | Q         | 2238.91        | 2220.90       | 2221.88        | 1119.96        | 18 |
| 18 | 2015.05        | 1997.04        | 1998.02        | 1008.02       | P         | <b>2110.84</b> | 2092.84       | 2093.82        | 1055.93        | 17 |
| 19 | 2128.13        | 2110.12        | 2111.11        | 1064.57       | L         | 2013.80        | 1995.79       | 1996.77        | 1007.40        | 16 |
| 20 | 2227.20        | 2209.19        | 2210.17        | 1114.10       | V         | 1900.72        | 1882.70       | 1883.69        | 950.86         | 15 |
| 21 | 2374.24        | 2356.23        | 2357.21        | 1187.62       | M(+15.99) | <b>1801.65</b> | 1783.64       | 1784.62        | 901.32         | 14 |
| 22 | 2503.28        | 2485.27        | 2486.25        | 1252.14       | E         | 1654.61        | 1636.60       | 1637.58        | 827.81         | 13 |
| 23 | 2631.34        | 2613.33        | 2614.31        | 1316.17       | Q         | 1525.57        | 1507.56       | <b>1508.51</b> | 763.28         | 12 |
| 24 | 2760.38        | 2742.37        | 2743.35        | 1380.69       | E         | 1397.51        | 1379.50       | 1380.48        | 699.26         | 11 |
| 25 | 2889.42        | 2871.41        | 2872.40        | 1445.21       | E         | 1268.47        | 1250.46       | 1251.44        | 634.73         | 10 |
| 26 | 3056.42        | 3038.41        | 3039.39        | 1528.71       | S(+79.97) | <b>1139.41</b> | 1121.41       | 1122.40        | 570.21         | 9  |
| 27 | 3153.47        | 3135.46        | 3136.45        | 1577.24       | P         | <b>972.42</b>  | <b>954.41</b> | 955.40         | 486.71         | 8  |
| 28 | 3250.53        | 3232.52        | 3233.50        | 1625.76       | P         | <b>875.37</b>  | 857.36        | 858.35         | 438.19         | 7  |
| 29 | 3379.57        | 3361.56        | 3362.54        | 1690.28       | E         | <b>778.31</b>  | 760.31        | 761.29         | 389.66         | 6  |
| 30 | 3508.61        | 3490.60        | 3491.59        | 1754.81       | E         | <b>649.28</b>  | 631.27        | 632.25         | 325.14         | 5  |
| 31 | 3623.64        | 3605.63        | 3606.61        | 1812.32       | D         | <b>520.23</b>  | 502.23        | 503.21         | 260.62         | 4  |
| 32 | 3724.69        | 3706.68        | 3707.66        | 1862.84       | T         | <b>405.21</b>  | 387.20        | 388.18         | 203.10         | 3  |
| 33 | 3853.73        | 3835.72        | 3836.70        | 1927.36       | E         | <b>304.16</b>  | 286.15        | 287.13         | 152.58         | 2  |
| 34 |                |                |                |               | R         | <b>175.12</b>  | <b>157.10</b> | 158.09         | 88.06          | 1  |

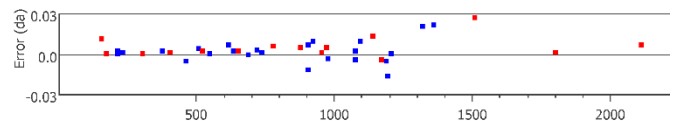

K2548-acetyl, Htt from mouse brain

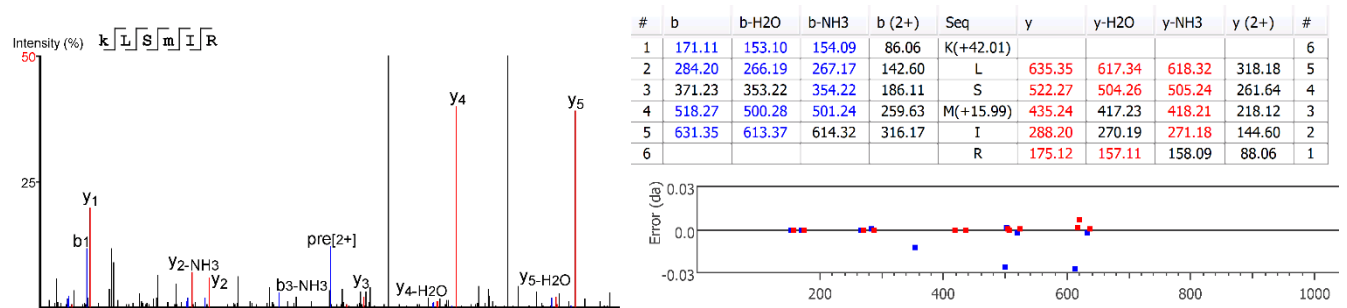

K2548-acetyl, Htt from human brain

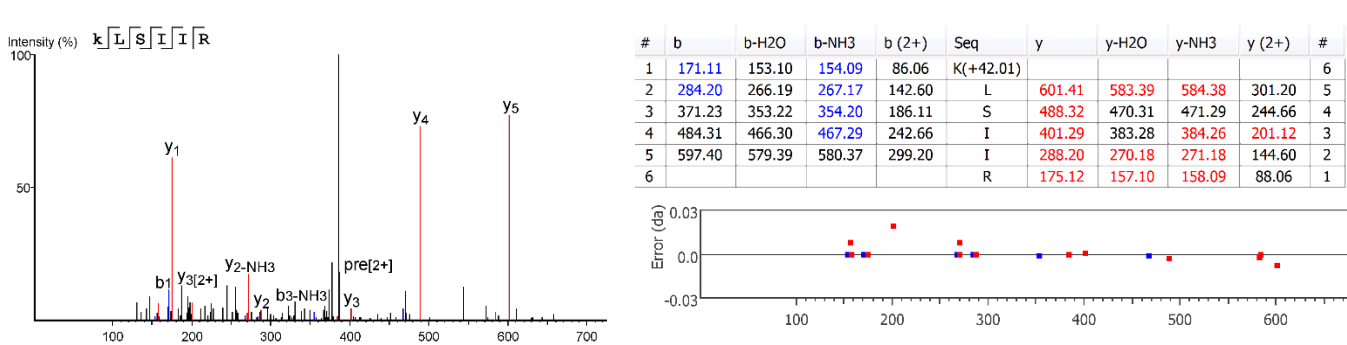

## K2615-acetyl, Htt from mouse brain

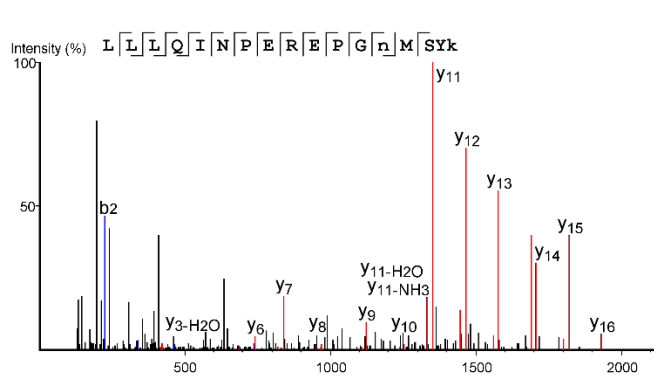

| #  | b       | b-H2O   | b-NH3   | b (2+) | Seq       | y       | y-H2O   | y-NH3   | y (2+) | #  |
|----|---------|---------|---------|--------|-----------|---------|---------|---------|--------|----|
| 1  | 114.09  | 96.08   | 97.06   | 57.55  | L         |         |         |         |        | 17 |
| 2  | 227.18  | 209.17  | 210.15  | 114.09 | L         | 1931.98 | 1913.94 | 1914.93 | 966.49 | 16 |
| 3  | 340.26  | 322.25  | 323.23  | 170.63 | L         | 1818.88 | 1800.86 | 1801.87 | 909.93 | 15 |
| 4  | 468.32  | 450.31  | 451.29  | 234.66 | Q         | 1705.80 | 1687.77 | 1688.78 | 853.39 | 14 |
| 5  | 581.40  | 563.39  | 564.38  | 291.20 | I         | 1577.75 | 1559.72 | 1560.71 | 789.36 | 13 |
| 6  | 695.45  | 677.43  | 678.42  | 348.22 | N         | 1464.66 | 1446.65 | 1447.64 | 732.82 | 12 |
| 7  | 792.50  | 774.49  | 775.47  | 396.75 | P         | 1350.61 | 1332.60 | 1333.59 | 675.80 | 11 |
| 8  | 921.54  | 903.53  | 904.51  | 461.27 | E         | 1253.57 | 1235.54 | 1236.54 | 627.27 | 10 |
| 9  | 1077.64 | 1059.63 | 1060.61 | 539.32 | R         | 1124.52 | 1106.49 | 1107.45 | 562.75 | 9  |
| 10 | 1206.68 | 1188.67 | 1189.66 | 603.84 | E         | 968.42  | 950.40  | 951.38  | 484.70 | 8  |
| 11 | 1303.74 | 1285.73 | 1286.71 | 652.37 | P         | 839.37  | 821.36  | 822.33  | 420.19 | 7  |
| 12 | 1350.76 | 1342.75 | 1343.73 | 680.88 | G         | 742.32  | 724.30  | 725.28  | 371.65 | 6  |
| 13 | 1475.79 | 1457.78 | 1458.76 | 738.39 | N(+.98)   | 685.30  | 667.28  | 668.26  | 343.14 | 5  |
| 14 | 1606.83 | 1588.82 | 1589.80 | 803.91 | M         | 570.26  | 552.25  | 553.23  | 285.63 | 4  |
| 15 | 1693.86 | 1675.85 | 1676.83 | 847.43 | S         | 439.22  | 421.21  | 422.19  | 220.11 | 3  |
| 16 | 1856.92 | 1838.91 | 1839.89 | 928.96 | Y         | 352.19  | 334.18  | 335.16  | 176.59 | 2  |
| 17 |         |         |         |        | K(+42.01) | 189.12  | 171.11  | 172.10  | 95.06  | 1  |

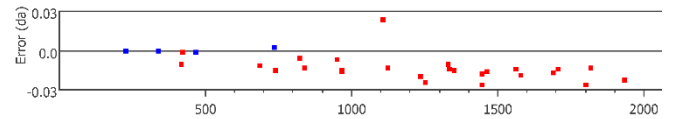

## K2615-acetyl, hu Htt from HEK293

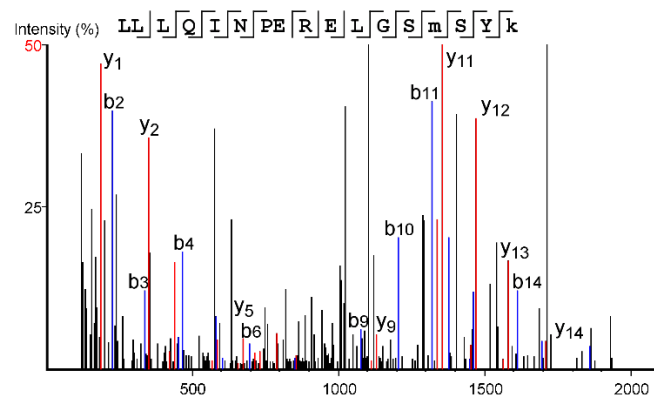

| #  | b       | b-H2O   | b-NH3   | b (2+) | Seq       | y       | y-H2O   | y-NH3   | y (2+) | #  |
|----|---------|---------|---------|--------|-----------|---------|---------|---------|--------|----|
| 1  | 114.09  | 96.08   | 97.06   | 57.55  | L         |         |         |         |        | 17 |
| 2  | 227.18  | 209.17  | 210.15  | 114.09 | L         | 1935.98 | 1917.97 | 1918.96 | 968.49 | 16 |
| 3  | 340.26  | 322.25  | 323.23  | 170.63 | L         | 1822.90 | 1804.89 | 1805.87 | 911.95 | 15 |
| 4  | 468.32  | 450.31  | 451.29  | 234.66 | Q         | 1709.81 | 1691.81 | 1692.79 | 855.41 | 14 |
| 5  | 581.40  | 563.39  | 564.38  | 291.20 | I         | 1581.75 | 1563.74 | 1564.73 | 791.39 | 13 |
| 6  | 695.45  | 677.43  | 678.42  | 348.22 | N         | 1468.67 | 1450.66 | 1451.65 | 734.84 | 12 |
| 7  | 792.50  | 774.49  | 775.47  | 396.75 | P         | 1354.63 | 1336.62 | 1337.61 | 677.82 | 11 |
| 8  | 921.54  | 903.53  | 904.51  | 461.27 | E         | 1257.58 | 1239.57 | 1240.55 | 629.29 | 10 |
| 9  | 1077.64 | 1059.63 | 1060.61 | 539.32 | R         | 1128.53 | 1110.54 | 1111.51 | 564.77 | 9  |
| 10 | 1206.68 | 1188.67 | 1189.66 | 603.84 | E         | 972.43  | 954.42  | 955.41  | 486.72 | 8  |
| 11 | 1319.77 | 1301.76 | 1302.74 | 660.38 | L         | 843.39  | 825.38  | 826.36  | 422.20 | 7  |
| 12 | 1376.79 | 1358.78 | 1359.76 | 688.90 | G         | 730.31  | 712.29  | 713.28  | 365.65 | 6  |
| 13 | 1463.82 | 1445.81 | 1446.80 | 732.41 | S         | 673.29  | 655.28  | 656.28  | 337.14 | 5  |
| 14 | 1610.85 | 1592.85 | 1593.83 | 805.93 | M(+15.99) | 586.25  | 568.24  | 569.23  | 293.63 | 4  |
| 15 | 1697.89 | 1679.88 | 1680.86 | 849.43 | S         | 439.22  | 421.21  | 422.19  | 220.11 | 3  |
| 16 | 1860.95 | 1842.94 | 1843.93 | 930.98 | Y         | 352.19  | 334.18  | 335.16  | 176.59 | 2  |
| 17 |         |         |         |        | K(+42.01) | 189.12  | 171.11  | 172.10  | 95.06  | 1  |

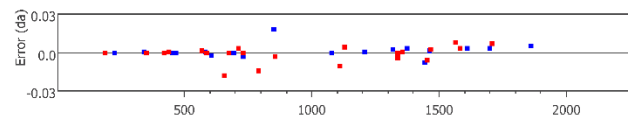

## S2652-phospho, hu Htt from HEK293

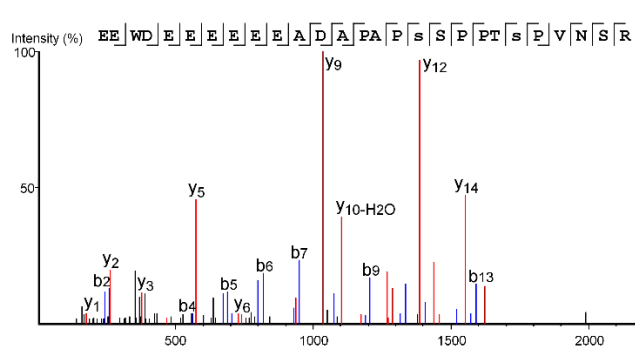

| #  | b       | b-H2O   | b-NH3   | b (2+)  | Seq       | y       | y-H2O   | y-NH3   | y (2+)  | #  |
|----|---------|---------|---------|---------|-----------|---------|---------|---------|---------|----|
| 1  | 130.05  | 112.04  | 113.02  | 65.53   | E         |         |         |         |         | 27 |
| 2  | 259.09  | 241.08  | 242.07  | 130.05  | E         | 3015.15 | 2997.13 | 2998.12 | 1508.07 | 26 |
| 3  | 445.17  | 427.16  | 428.15  | 223.09  | W         | 2886.10 | 2868.09 | 2869.08 | 1443.55 | 25 |
| 4  | 560.20  | 542.19  | 543.17  | 280.60  | D         | 2700.02 | 2682.01 | 2683.00 | 1350.51 | 24 |
| 5  | 689.24  | 671.23  | 672.21  | 345.12  | E         | 2585.00 | 2566.99 | 2567.97 | 1293.00 | 23 |
| 6  | 818.28  | 800.27  | 801.26  | 409.64  | E         | 2455.95 | 2437.94 | 2438.93 | 1228.48 | 22 |
| 7  | 947.32  | 929.32  | 930.30  | 474.16  | E         | 2326.91 | 2308.90 | 2309.88 | 1163.96 | 21 |
| 8  | 1076.36 | 1058.36 | 1059.34 | 538.68  | E         | 2197.87 | 2179.86 | 2180.84 | 1099.43 | 20 |
| 9  | 1205.41 | 1187.41 | 1188.39 | 603.21  | E         | 2068.83 | 2050.82 | 2051.80 | 1034.91 | 19 |
| 10 | 1334.46 | 1316.43 | 1317.43 | 667.73  | E         | 1939.78 | 1921.77 | 1922.76 | 970.39  | 18 |
| 11 | 1405.49 | 1387.48 | 1388.46 | 703.24  | A         | 1810.74 | 1792.73 | 1793.71 | 905.87  | 17 |
| 12 | 1520.51 | 1502.51 | 1503.49 | 760.76  | D         | 1739.70 | 1721.69 | 1722.68 | 870.35  | 16 |
| 13 | 1591.55 | 1573.54 | 1574.53 | 796.28  | A         | 1624.68 | 1606.67 | 1607.65 | 812.84  | 15 |
| 14 | 1688.61 | 1670.60 | 1671.58 | 844.80  | P         | 1553.64 | 1535.63 | 1536.61 | 777.32  | 14 |
| 15 | 1759.65 | 1741.64 | 1742.62 | 880.32  | A         | 1456.59 | 1438.58 | 1439.56 | 728.79  | 13 |
| 16 | 1856.70 | 1838.69 | 1839.67 | 928.85  | P         | 1385.55 | 1367.54 | 1368.52 | 693.27  | 12 |
| 17 | 2023.70 | 2005.69 | 2006.67 | 1012.35 | S(+79.97) | 1288.50 | 1270.49 | 1271.47 | 644.75  | 11 |
| 18 | 2110.73 | 2092.72 | 2093.70 | 1055.86 | S         | 1121.50 | 1103.49 | 1104.47 | 561.25  | 10 |
| 19 | 2207.78 | 2189.77 | 2190.75 | 1104.39 | P         | 1034.46 | 1016.46 | 1017.44 | 517.73  | 9  |
| 20 | 2304.83 | 2286.82 | 2287.81 | 1152.92 | P         | 937.41  | 919.40  | 920.39  | 469.21  | 8  |
| 21 | 2405.88 | 2387.87 | 2388.85 | 1203.44 | T         | 840.36  | 822.35  | 823.33  | 420.68  | 7  |
| 22 | 2572.88 | 2554.87 | 2555.85 | 1286.94 | S(+79.97) | 739.31  | 721.30  | 722.29  | 370.16  | 6  |
| 23 | 2669.93 | 2651.92 | 2652.91 | 1335.45 | P         | 572.31  | 554.30  | 555.29  | 286.66  | 5  |
| 24 | 2769.00 | 2750.99 | 2751.97 | 1385.00 | V         | 475.26  | 457.25  | 458.24  | 238.13  | 4  |
| 25 | 2883.04 | 2865.03 | 2866.02 | 1442.02 | N         | 376.19  | 358.18  | 359.17  | 188.60  | 3  |
| 26 | 2970.08 | 2952.07 | 2953.05 | 1485.54 | S         | 262.15  | 244.14  | 245.12  | 131.58  | 2  |
| 27 |         |         |         |         | R         | 175.12  | 157.11  | 158.09  | 88.06   | 1  |

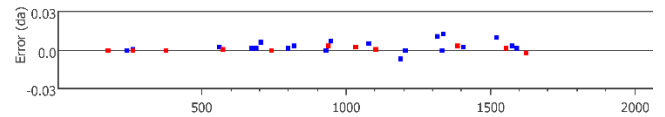

## S2653-phospho, hu Htt from HEK293

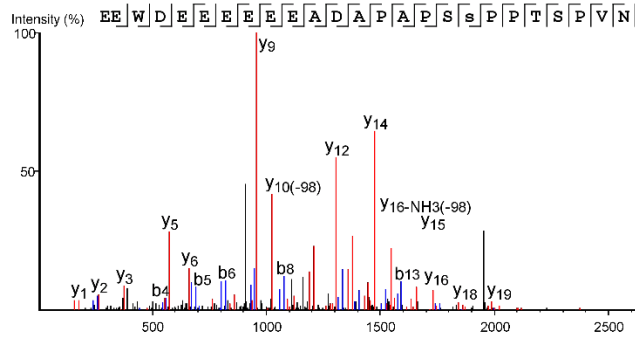

| #  | b       | b-H2O   | b-NH3   | b (2+)  | Seq       | y       | y-H2O   | y-NH3   | y (2+)  | #  |
|----|---------|---------|---------|---------|-----------|---------|---------|---------|---------|----|
| 1  | 130.05  | 112.04  | 113.02  | 65.53   | E         |         |         |         |         | 27 |
| 2  | 259.09  | 241.08  | 242.07  | 130.05  | E         | 2935.18 | 2917.17 | 2918.15 | 1468.09 | 26 |
| 3  | 445.17  | 427.16  | 428.15  | 223.09  | W         | 2806.14 | 2788.13 | 2789.11 | 1403.57 | 25 |
| 4  | 560.20  | 542.19  | 543.17  | 280.60  | D         | 2620.06 | 2602.05 | 2603.03 | 1310.53 | 24 |
| 5  | 689.24  | 671.23  | 672.21  | 345.12  | E         | 2505.03 | 2487.02 | 2488.00 | 1253.02 | 23 |
| 6  | 818.28  | 800.27  | 801.28  | 409.64  | E         | 2375.98 | 2357.98 | 2358.96 | 1188.49 | 22 |
| 7  | 947.32  | 929.31  | 930.30  | 474.16  | E         | 2246.94 | 2228.93 | 2229.92 | 1123.97 | 21 |
| 8  | 1076.37 | 1058.36 | 1059.34 | 538.68  | E         | 2117.90 | 2099.88 | 2100.90 | 1059.45 | 20 |
| 9  | 1205.41 | 1187.40 | 1188.39 | 603.21  | E         | 1988.86 | 1970.86 | 1971.83 | 994.93  | 19 |
| 10 | 1334.46 | 1316.44 | 1317.45 | 667.73  | E         | 1859.83 | 1841.82 | 1842.80 | 930.41  | 18 |
| 11 | 1405.49 | 1387.48 | 1388.48 | 703.24  | A         | 1730.77 | 1712.76 | 1713.76 | 865.89  | 17 |
| 12 | 1520.51 | 1502.51 | 1503.50 | 760.76  | D         | 1659.74 | 1641.73 | 1642.72 | 830.37  | 16 |
| 13 | 1591.55 | 1573.55 | 1574.54 | 796.26  | A         | 1544.71 | 1526.70 | 1527.70 | 772.86  | 15 |
| 14 | 1688.61 | 1670.60 | 1671.58 | 844.80  | P         | 1473.67 | 1455.65 | 1456.66 | 737.34  | 14 |
| 15 | 1759.65 | 1741.64 | 1742.64 | 880.32  | A         | 1376.62 | 1358.61 | 1359.59 | 688.81  | 13 |
| 16 | 1856.70 | 1838.69 | 1839.67 | 928.85  | P         | 1305.58 | 1287.57 | 1288.57 | 653.29  | 12 |
| 17 | 1943.73 | 1925.72 | 1926.70 | 972.37  | S         | 1208.53 | 1190.52 | 1191.50 | 604.77  | 11 |
| 18 | 2110.73 | 2092.72 | 2093.70 | 1055.86 | S(+79.97) | 1121.50 | 1103.49 | 1104.47 | 561.25  | 10 |
| 19 | 2207.78 | 2189.77 | 2190.75 | 1104.39 | P         | 954.50  | 936.49  | 937.48  | 477.75  | 9  |
| 20 | 2304.83 | 2286.82 | 2287.81 | 1152.92 | P         | 857.45  | 839.44  | 840.42  | 429.22  | 8  |
| 21 | 2405.88 | 2387.87 | 2388.85 | 1203.44 | T         | 760.40  | 742.38  | 743.37  | 380.70  | 7  |
| 22 | 2492.91 | 2474.90 | 2475.89 | 1246.96 | S         | 659.35  | 641.34  | 642.32  | 330.17  | 6  |
| 23 | 2589.97 | 2571.96 | 2572.94 | 1295.48 | P         | 572.31  | 554.30  | 555.29  | 286.66  | 5  |
| 24 | 2689.04 | 2671.02 | 2672.01 | 1345.02 | V         | 475.26  | 457.25  | 458.24  | 238.13  | 4  |
| 25 | 2803.08 | 2785.07 | 2786.05 | 1402.04 | N         | 376.19  | 358.18  | 359.17  | 188.60  | 3  |
| 26 | 2890.11 | 2872.10 | 2873.08 | 1445.56 | S         | 262.15  | 244.14  | 245.12  | 131.58  | 2  |
| 27 |         |         |         |         | R         | 175.12  | 157.11  | 158.09  | 88.06   | 1  |

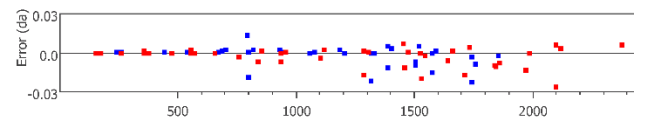



## S2653-phospho, S2657-phospho, Htt from mouse brain

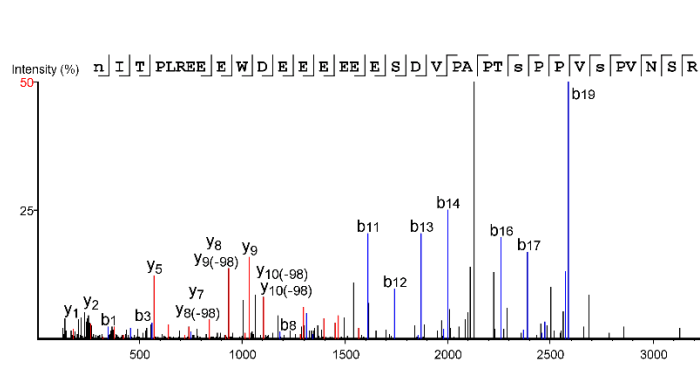

| #  | b       | b-H2O   | b-NH3   | b (2+)  | Seq        | y       | y-H2O   | y-NH3   | y (2+)  | #  |
|----|---------|---------|---------|---------|------------|---------|---------|---------|---------|----|
| 1  | 344.21  | 326.20  | 327.19  | 172.61  | N(+229.16) |         |         |         |         | 34 |
| 2  | 457.30  | 439.29  | 440.27  | 229.15  | I          | 3909.66 | 3891.65 | 3892.64 | 1955.33 | 33 |
| 3  | 558.34  | 540.33  | 541.32  | 279.67  | T          | 3796.58 | 3778.57 | 3779.55 | 1898.79 | 32 |
| 4  | 655.40  | 637.39  | 638.37  | 328.20  | P          | 3695.53 | 3677.52 | 3678.50 | 1848.27 | 31 |
| 5  | 768.48  | 750.47  | 751.46  | 384.74  | L          | 3598.48 | 3580.47 | 3581.45 | 1799.74 | 30 |
| 6  | 924.58  | 906.57  | 907.56  | 462.79  | R          | 3485.39 | 3467.38 | 3468.37 | 1743.20 | 29 |
| 7  | 1053.63 | 1035.62 | 1036.60 | 527.31  | E          | 3329.29 | 3311.28 | 3312.27 | 1665.15 | 28 |
| 8  | 1182.66 | 1164.66 | 1165.64 | 591.83  | E          | 3200.25 | 3182.24 | 3183.22 | 1600.63 | 27 |
| 9  | 1311.71 | 1293.70 | 1294.68 | 656.36  | E          | 3071.21 | 3053.20 | 3054.18 | 1536.10 | 26 |
| 10 | 1497.79 | 1479.78 | 1480.76 | 749.41  | W          | 2942.17 | 2924.15 | 2925.14 | 1471.58 | 25 |
| 11 | 1612.81 | 1594.81 | 1595.79 | 806.91  | D          | 2756.09 | 2738.08 | 2739.06 | 1378.54 | 24 |
| 12 | 1741.86 | 1723.85 | 1724.83 | 871.43  | E          | 2641.06 | 2623.05 | 2624.03 | 1321.03 | 23 |
| 13 | 1870.89 | 1852.89 | 1853.89 | 935.95  | E          | 2512.02 | 2494.01 | 2494.99 | 1256.51 | 22 |
| 14 | 1999.94 | 1981.92 | 1982.92 | 1000.47 | E          | 2382.97 | 2364.96 | 2365.95 | 1191.91 | 21 |
| 15 | 2128.99 | 2110.98 | 2111.96 | 1064.99 | E          | 2253.93 | 2235.92 | 2236.90 | 1127.47 | 20 |
| 16 | 2258.03 | 2240.02 | 2241.00 | 1129.52 | E          | 2124.89 | 2106.88 | 2107.86 | 1062.94 | 19 |
| 17 | 2387.06 | 2369.05 | 2370.05 | 1194.04 | E          | 1995.85 | 1977.84 | 1978.82 | 998.42  | 18 |
| 18 | 2474.11 | 2456.09 | 2457.08 | 1237.55 | S          | 1866.80 | 1848.79 | 1849.78 | 933.90  | 17 |
| 19 | 2589.13 | 2571.12 | 2572.10 | 1295.07 | D          | 1779.77 | 1761.76 | 1762.74 | 890.39  | 16 |
| 20 | 2688.20 | 2670.19 | 2671.17 | 1344.59 | V          | 1664.74 | 1646.73 | 1647.72 | 832.87  | 15 |
| 21 | 2785.25 | 2767.24 | 2768.23 | 1393.13 | P          | 1565.69 | 1547.67 | 1548.65 | 783.34  | 14 |
| 22 | 2856.29 | 2838.28 | 2839.26 | 1428.65 | A          | 1468.62 | 1450.61 | 1451.60 | 734.81  | 13 |
| 23 | 2953.34 | 2935.33 | 2936.32 | 1477.17 | P          | 1397.58 | 1379.58 | 1380.56 | 699.29  | 12 |
| 24 | 3054.39 | 3036.38 | 3037.36 | 1527.70 | T          | 1300.53 | 1282.52 | 1283.51 | 650.77  | 11 |
| 25 | 3221.39 | 3203.38 | 3204.36 | 1611.19 | S(+79.97)  | 1199.49 | 1181.48 | 1182.46 | 600.24  | 10 |
| 26 | 3318.44 | 3300.43 | 3301.41 | 1659.72 | P          | 1032.49 | 1014.48 | 1015.48 | 516.74  | 9  |
| 27 | 3415.49 | 3397.48 | 3398.47 | 1708.25 | P          | 935.43  | 917.42  | 918.41  | 468.22  | 8  |
| 28 | 3514.56 | 3496.55 | 3497.54 | 1757.78 | V          | 838.38  | 820.37  | 821.35  | 419.69  | 7  |
| 29 | 3681.56 | 3663.55 | 3664.53 | 1841.28 | S(+79.97)  | 739.31  | 721.30  | 722.29  | 370.16  | 6  |
| 30 | 3778.61 | 3760.60 | 3761.59 | 1889.81 | P          | 572.31  | 554.30  | 555.29  | 286.66  | 5  |
| 31 | 3877.68 | 3859.67 | 3860.66 | 1939.34 | V          | 475.26  | 457.25  | 458.24  | 238.13  | 4  |
| 32 | 3991.73 | 3973.71 | 3974.70 | 1996.36 | N          | 376.19  | 358.18  | 359.17  | 188.60  | 3  |
| 33 | 4078.76 | 4060.75 | 4061.73 | 2039.88 | S          | 262.15  | 244.14  | 245.12  | 131.58  | 2  |
| 34 |         |         |         |         | R          | 175.12  | 157.11  | 158.09  | 88.06   | 1  |

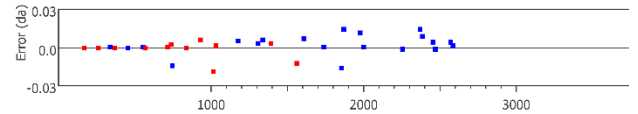

## S2653-phospho, S2657-phospho, Htt from human brain

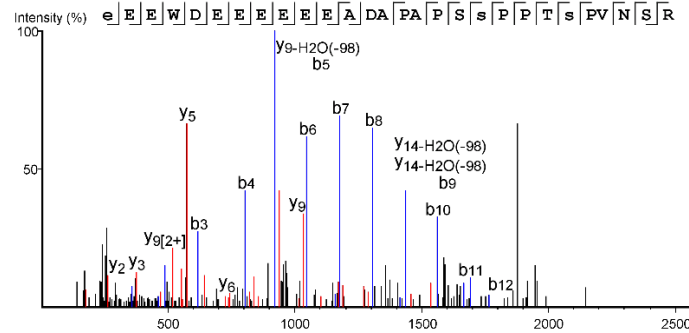

| #  | b       | b-H2O   | b-NH3   | b (2+)  | Seq        | y       | y-H2O   | y-NH3   | y (2+)  | #  |
|----|---------|---------|---------|---------|------------|---------|---------|---------|---------|----|
| 1  | 359.21  | 341.20  | 342.19  | 180.11  | E(+229.16) |         |         |         |         | 28 |
| 2  | 488.26  | 470.25  | 471.23  | 244.63  | E          | 3144.19 | 3126.18 | 3127.16 | 1572.59 | 27 |
| 3  | 617.30  | 599.29  | 600.27  | 309.15  | E          | 3015.15 | 2997.13 | 2998.12 | 1508.07 | 26 |
| 4  | 803.38  | 785.37  | 786.35  | 402.19  | W          | 2886.10 | 2868.09 | 2869.08 | 1443.55 | 25 |
| 5  | 918.41  | 900.39  | 901.38  | 459.71  | D          | 2700.02 | 2682.01 | 2683.00 | 1350.51 | 24 |
| 6  | 1047.45 | 1029.44 | 1030.42 | 524.22  | E          | 2585.00 | 2566.99 | 2567.97 | 1293.00 | 23 |
| 7  | 1176.49 | 1158.48 | 1159.46 | 588.74  | E          | 2455.95 | 2437.94 | 2438.93 | 1228.48 | 22 |
| 8  | 1305.53 | 1287.51 | 1288.51 | 653.27  | E          | 2326.91 | 2308.90 | 2309.88 | 1163.96 | 21 |
| 9  | 1434.57 | 1416.56 | 1417.55 | 717.79  | E          | 2197.87 | 2179.86 | 2180.84 | 1099.43 | 20 |
| 10 | 1563.62 | 1545.61 | 1546.59 | 782.31  | E          | 2068.83 | 2050.82 | 2051.80 | 1034.91 | 19 |
| 11 | 1692.66 | 1674.65 | 1675.63 | 846.83  | E          | 1939.78 | 1921.77 | 1922.76 | 970.39  | 18 |
| 12 | 1763.70 | 1745.69 | 1746.67 | 882.35  | A          | 1810.74 | 1792.73 | 1793.71 | 905.87  | 17 |
| 13 | 1878.72 | 1860.71 | 1861.70 | 939.86  | D          | 1739.70 | 1721.69 | 1722.68 | 870.35  | 16 |
| 14 | 1949.76 | 1931.75 | 1932.73 | 975.38  | A          | 1624.68 | 1606.67 | 1607.65 | 812.84  | 15 |
| 15 | 2046.81 | 2028.80 | 2029.79 | 1023.91 | P          | 1553.64 | 1535.62 | 1536.61 | 777.32  | 14 |
| 16 | 2117.85 | 2099.84 | 2100.82 | 1059.43 | A          | 1456.59 | 1438.58 | 1439.56 | 728.79  | 13 |
| 17 | 2214.90 | 2196.89 | 2197.88 | 1107.95 | P          | 1385.55 | 1367.54 | 1368.52 | 693.27  | 12 |
| 18 | 2301.94 | 2283.93 | 2284.91 | 1151.47 | S          | 1288.50 | 1270.49 | 1271.47 | 644.75  | 11 |
| 19 | 2468.93 | 2450.92 | 2451.91 | 1234.97 | S(+79.97)  | 1201.46 | 1183.45 | 1184.44 | 601.23  | 10 |
| 20 | 2565.99 | 2547.98 | 2548.96 | 1283.49 | P          | 1034.47 | 1016.46 | 1017.44 | 517.74  | 9  |
| 21 | 2663.04 | 2645.03 | 2646.01 | 1332.02 | P          | 937.41  | 919.40  | 920.39  | 469.21  | 8  |
| 22 | 2764.09 | 2746.08 | 2747.06 | 1382.54 | T          | 840.36  | 822.35  | 823.33  | 420.68  | 7  |
| 23 | 2931.09 | 2913.08 | 2914.06 | 1466.04 | S(+79.97)  | 739.31  | 721.30  | 722.29  | 370.16  | 6  |
| 24 | 3028.14 | 3010.13 | 3011.11 | 1514.57 | P          | 572.32  | 554.30  | 555.29  | 286.66  | 5  |
| 25 | 3127.21 | 3109.20 | 3110.18 | 1564.10 | V          | 475.26  | 457.25  | 458.24  | 238.13  | 4  |
| 26 | 3241.25 | 3223.24 | 3224.22 | 1621.12 | N          | 376.19  | 358.18  | 359.17  | 188.60  | 3  |
| 27 | 3328.28 | 3310.27 | 3311.26 | 1664.67 | S          | 262.15  | 244.14  | 245.12  | 131.58  | 2  |
| 28 |         |         |         |         | R          | 175.12  | 157.11  | 158.09  | 88.06   | 1  |

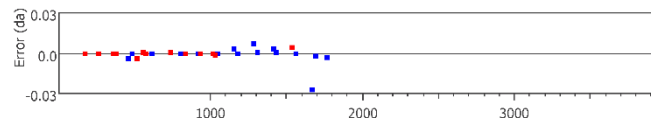

## S2936-phospho, Htt from mouse brain

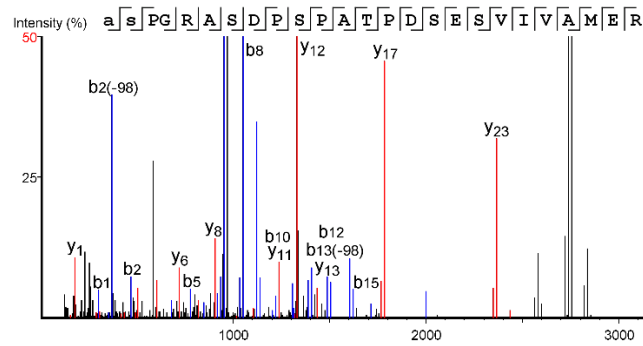

| #  | b       | b-H2O   | b-NH3   | b (2+)  | Seq        | y       | y-H2O   | y-NH3   | y (2+)  | #  |
|----|---------|---------|---------|---------|------------|---------|---------|---------|---------|----|
| 1  | 301.21  | 283.20  | 284.18  | 151.10  | A(+229.16) |         |         |         |         | 25 |
| 2  | 468.21  | 450.20  | 451.18  | 234.60  | S(+79.97)  | 2536.14 | 2518.13 | 2519.11 | 1268.57 | 24 |
| 3  | 565.26  | 547.25  | 548.23  | 283.13  | P          | 2369.14 | 2351.14 | 2352.11 | 1185.07 | 23 |
| 4  | 622.28  | 604.29  | 605.25  | 311.64  | G          | 2272.09 | 2254.08 | 2255.06 | 1136.54 | 22 |
| 5  | 778.38  | 760.37  | 761.35  | 389.69  | R          | 2215.07 | 2197.06 | 2198.04 | 1108.03 | 21 |
| 6  | 849.42  | 831.41  | 832.39  | 425.21  | A          | 2058.96 | 2040.95 | 2041.94 | 1029.98 | 20 |
| 7  | 936.47  | 918.44  | 919.42  | 468.73  | S          | 1987.93 | 1969.92 | 1970.90 | 994.46  | 19 |
| 8  | 1051.48 | 1033.46 | 1034.45 | 526.24  | D          | 1900.90 | 1882.89 | 1883.87 | 950.95  | 18 |
| 9  | 1148.53 | 1130.52 | 1131.50 | 574.77  | P          | 1785.87 | 1767.86 | 1768.86 | 893.43  | 17 |
| 10 | 1235.56 | 1217.54 | 1218.56 | 618.28  | S          | 1688.82 | 1670.81 | 1671.79 | 844.91  | 16 |
| 11 | 1332.62 | 1314.62 | 1315.59 | 666.81  | P          | 1601.79 | 1583.77 | 1584.76 | 801.39  | 15 |
| 12 | 1403.65 | 1385.64 | 1386.63 | 702.33  | A          | 1504.73 | 1486.70 | 1487.70 | 752.87  | 14 |
| 13 | 1504.73 | 1486.70 | 1487.70 | 752.85  | T          | 1433.69 | 1415.68 | 1416.67 | 717.35  | 13 |
| 14 | 1601.75 | 1583.74 | 1584.73 | 801.38  | P          | 1332.65 | 1314.62 | 1315.64 | 666.82  | 12 |
| 15 | 1716.78 | 1698.77 | 1699.75 | 858.89  | D          | 1235.59 | 1217.58 | 1218.56 | 618.30  | 11 |
| 16 | 1803.81 | 1785.80 | 1786.78 | 902.41  | S          | 1120.57 | 1102.56 | 1103.54 | 560.78  | 10 |
| 17 | 1932.85 | 1914.84 | 1915.83 | 966.93  | E          | 1033.54 | 1015.52 | 1016.51 | 517.27  | 9  |
| 18 | 2019.89 | 2001.87 | 2002.86 | 1010.44 | S          | 904.49  | 886.48  | 887.47  | 452.75  | 8  |
| 19 | 2118.95 | 2100.94 | 2101.93 | 1059.98 | V          | 817.46  | 799.45  | 800.43  | 409.23  | 7  |
| 20 | 2232.04 | 2214.03 | 2215.01 | 1116.52 | I          | 718.39  | 700.38  | 701.36  | 359.70  | 6  |
| 21 | 2331.11 | 2313.10 | 2314.08 | 1166.05 | V          | 605.31  | 587.30  | 588.28  | 303.15  | 5  |
| 22 | 2402.14 | 2384.13 | 2385.12 | 1201.56 | A          | 506.24  | 488.23  | 489.21  | 253.62  | 4  |
| 23 | 2533.18 | 2515.17 | 2516.16 | 1267.09 | M          | 435.20  | 417.19  | 418.17  | 218.10  | 3  |
| 24 | 2662.23 | 2644.22 | 2645.20 | 1331.61 | E          | 304.16  | 286.15  | 287.14  | 152.58  | 2  |
| 25 |         |         |         |         | R          | 175.12  | 157.11  | 158.09  | 88.06   | 1  |

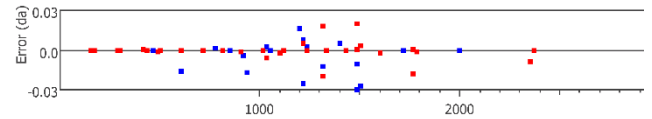

## S2936-phospho, hu Htt from HEK293

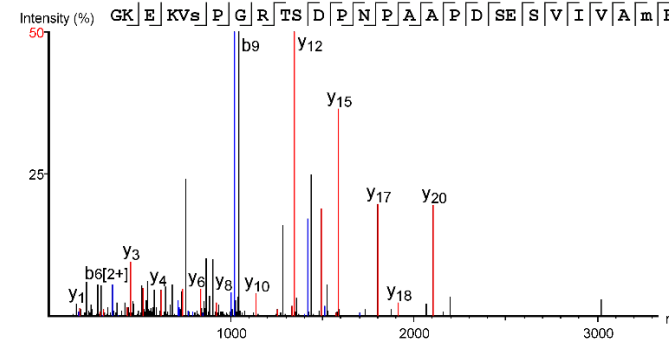

| #  | b       | b-H2O   | b-NH3   | b (2+)  | Seq       | y       | y-H2O   | y-NH3   | y (2+)  | #  |
|----|---------|---------|---------|---------|-----------|---------|---------|---------|---------|----|
| 1  | 58.03   | 40.02   | 41.00   | 29.51   | G         |         |         |         |         | 29 |
| 2  | 186.12  | 168.11  | 169.10  | 93.56   | K         | 3063.45 | 3045.43 | 3046.42 | 1532.22 | 28 |
| 3  | 315.17  | 297.16  | 298.14  | 158.08  | E         | 2935.35 | 2917.34 | 2918.32 | 1468.18 | 27 |
| 4  | 443.26  | 425.25  | 426.23  | 222.13  | K         | 2806.31 | 2788.30 | 2789.28 | 1403.65 | 26 |
| 5  | 542.33  | 524.32  | 525.30  | 271.67  | V         | 2678.21 | 2660.20 | 2661.19 | 1339.61 | 25 |
| 6  | 709.34  | 691.32  | 692.30  | 355.16  | S(+79.97) | 2579.14 | 2561.13 | 2562.12 | 1290.07 | 24 |
| 7  | 806.38  | 788.37  | 789.36  | 403.69  | P         | 2412.15 | 2394.14 | 2395.12 | 1206.57 | 23 |
| 8  | 863.40  | 845.39  | 846.38  | 432.20  | G         | 2315.09 | 2297.08 | 2298.07 | 1158.05 | 22 |
| 9  | 1019.47 | 1001.47 | 1002.48 | 510.25  | R         | 2258.07 | 2240.06 | 2241.04 | 1129.54 | 21 |
| 10 | 1120.55 | 1102.54 | 1103.52 | 560.78  | T         | 2101.97 | 2083.96 | 2084.94 | 1051.49 | 20 |
| 11 | 1207.58 | 1189.57 | 1190.56 | 604.29  | S         | 2000.92 | 1982.91 | 1983.90 | 1000.96 | 19 |
| 12 | 1322.61 | 1304.60 | 1305.58 | 661.81  | D         | 1913.89 | 1895.88 | 1896.86 | 957.45  | 18 |
| 13 | 1419.67 | 1401.66 | 1402.64 | 710.33  | P         | 1798.86 | 1780.85 | 1781.84 | 899.93  | 17 |
| 14 | 1533.71 | 1515.70 | 1516.68 | 767.34  | N         | 1701.81 | 1683.80 | 1684.78 | 851.41  | 16 |
| 15 | 1630.76 | 1612.75 | 1613.73 | 815.88  | P         | 1587.76 | 1569.76 | 1570.76 | 794.38  | 15 |
| 16 | 1701.81 | 1683.79 | 1684.77 | 851.40  | A         | 1490.71 | 1472.70 | 1473.69 | 745.86  | 14 |
| 17 | 1772.83 | 1754.82 | 1755.81 | 886.92  | A         | 1419.67 | 1401.66 | 1402.67 | 710.34  | 13 |
| 18 | 1869.89 | 1851.88 | 1852.86 | 935.44  | P         | 1348.64 | 1330.63 | 1331.61 | 674.82  | 12 |
| 19 | 1984.91 | 1966.90 | 1967.89 | 992.96  | D         | 1251.60 | 1233.58 | 1234.56 | 626.29  | 11 |
| 20 | 2071.94 | 2053.93 | 2054.92 | 1036.47 | S         | 1136.56 | 1118.55 | 1119.53 | 568.78  | 10 |
| 21 | 2200.99 | 2182.98 | 2183.96 | 1100.99 | E         | 1049.53 | 1031.52 | 1032.50 | 525.26  | 9  |
| 22 | 2288.02 | 2270.01 | 2270.99 | 1144.51 | S         | 920.49  | 902.48  | 903.46  | 460.74  | 8  |
| 23 | 2387.09 | 2369.08 | 2370.06 | 1194.04 | V         | 833.45  | 815.44  | 816.43  | 417.23  | 7  |
| 24 | 2500.17 | 2482.16 | 2483.14 | 1250.59 | I         | 734.38  | 716.38  | 717.36  | 367.69  | 6  |
| 25 | 2599.24 | 2581.23 | 2582.21 | 1300.12 | V         | 621.30  | 603.29  | 604.28  | 311.15  | 5  |
| 26 | 2670.28 | 2652.27 | 2653.25 | 1335.64 | A         | 522.23  | 504.22  | 505.21  | 261.62  | 4  |
| 27 | 2817.31 | 2799.30 | 2800.29 | 1409.16 | M(+15.99) | 451.22  | 433.20  | 434.17  | 226.10  | 3  |
| 28 | 2946.36 | 2928.34 | 2929.33 | 1473.68 | E         | 304.16  | 286.14  | 287.13  | 152.58  | 2  |
| 29 |         |         |         |         | R         | 175.12  | 157.11  | 158.09  | 88.06   | 1  |

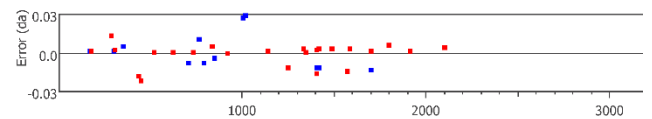



## S2941-phospho, Htt from mouse brain

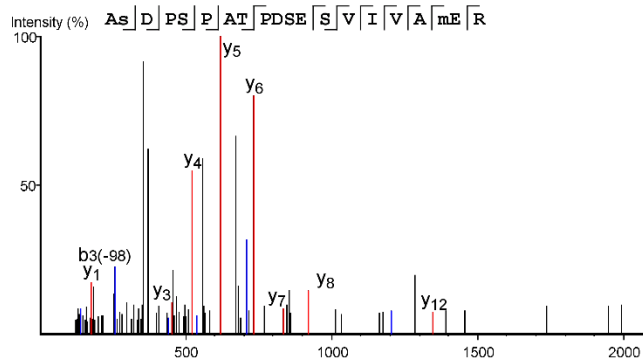

| #  | b       | b-H2O   | b-NH3   | b (2+) | Seq       | y       | y-H2O   | y-NH3   | y (2+)  | #  |
|----|---------|---------|---------|--------|-----------|---------|---------|---------|---------|----|
| 1  | 72.04   | 54.03   | 55.02   | 36.52  | A         |         |         |         |         | 20 |
| 2  | 239.04  | 221.03  | 222.02  | 120.02 | S(+79.97) | 2083.89 | 2065.88 | 2066.86 | 1042.44 | 19 |
| 3  | 354.07  | 336.06  | 337.04  | 177.54 | D         | 1916.89 | 1898.88 | 1899.86 | 958.95  | 18 |
| 4  | 451.12  | 433.11  | 434.10  | 226.06 | P         | 1801.86 | 1783.85 | 1784.84 | 901.43  | 17 |
| 5  | 538.16  | 520.14  | 521.13  | 269.58 | S         | 1704.81 | 1686.80 | 1687.78 | 852.91  | 16 |
| 6  | 635.21  | 617.20  | 618.18  | 318.10 | P         | 1617.78 | 1599.77 | 1600.75 | 809.39  | 15 |
| 7  | 706.24  | 688.23  | 689.22  | 353.62 | A         | 1520.73 | 1502.72 | 1503.70 | 760.86  | 14 |
| 8  | 807.29  | 789.28  | 790.27  | 404.15 | T         | 1449.69 | 1431.68 | 1432.66 | 725.34  | 13 |
| 9  | 904.35  | 886.33  | 887.32  | 452.67 | P         | 1348.66 | 1330.63 | 1331.61 | 674.82  | 12 |
| 10 | 1019.37 | 1001.36 | 1002.35 | 510.19 | D         | 1251.59 | 1233.58 | 1234.56 | 626.29  | 11 |
| 11 | 1106.40 | 1088.39 | 1089.38 | 553.70 | S         | 1136.56 | 1118.55 | 1119.53 | 568.78  | 10 |
| 12 | 1235.45 | 1217.44 | 1218.42 | 618.22 | E         | 1049.53 | 1031.52 | 1032.50 | 525.26  | 9  |
| 13 | 1322.48 | 1304.47 | 1305.45 | 661.74 | S         | 920.48  | 902.48  | 903.46  | 460.74  | 8  |
| 14 | 1421.55 | 1403.54 | 1404.52 | 711.27 | V         | 833.45  | 815.44  | 816.43  | 417.23  | 7  |
| 15 | 1534.63 | 1516.62 | 1517.60 | 767.82 | I         | 734.39  | 716.38  | 717.36  | 367.69  | 6  |
| 16 | 1633.70 | 1615.69 | 1616.67 | 817.35 | V         | 621.30  | 603.29  | 604.28  | 311.15  | 5  |
| 17 | 1704.74 | 1686.73 | 1687.71 | 852.87 | A         | 522.23  | 504.22  | 505.21  | 261.62  | 4  |
| 18 | 1851.77 | 1833.76 | 1834.75 | 926.39 | M(+15.99) | 451.20  | 433.19  | 434.17  | 226.10  | 3  |
| 19 | 1980.81 | 1962.80 | 1963.79 | 990.91 | E         | 304.16  | 286.15  | 287.13  | 152.58  | 2  |
| 20 |         |         |         |        | R         | 175.12  | 157.11  | 158.09  | 88.06   | 1  |

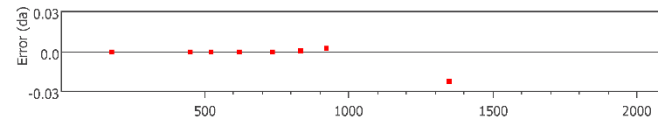

## S2941-phospho, hu Htt from HEK293

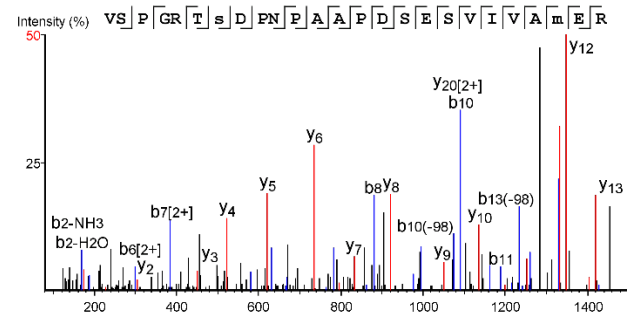

| #  | b       | b-H2O   | b-NH3   | b (2+)  | Seq       | y       | y-H2O   | y-NH3   | y (2+)  | #  |
|----|---------|---------|---------|---------|-----------|---------|---------|---------|---------|----|
| 1  | 100.08  | 82.07   | 83.05   | 50.54   | V         |         |         |         |         | 25 |
| 2  | 187.11  | 169.10  | 170.06  | 94.05   | S         | 2579.14 | 2561.13 | 2562.12 | 1290.07 | 24 |
| 3  | 284.16  | 266.15  | 267.13  | 142.58  | P         | 2492.11 | 2474.10 | 2475.09 | 1246.56 | 23 |
| 4  | 341.18  | 323.17  | 324.16  | 171.09  | G         | 2395.06 | 2377.05 | 2378.03 | 1198.05 | 22 |
| 5  | 497.28  | 479.27  | 480.26  | 249.14  | R         | 2338.04 | 2320.03 | 2321.01 | 1169.52 | 21 |
| 6  | 598.33  | 580.32  | 581.29  | 299.65  | T         | 2181.94 | 2163.93 | 2164.91 | 1091.45 | 20 |
| 7  | 765.33  | 747.32  | 748.30  | 383.16  | S(+79.97) | 2080.89 | 2062.88 | 2063.86 | 1040.94 | 19 |
| 8  | 880.35  | 862.35  | 863.33  | 440.68  | D         | 1913.89 | 1895.88 | 1896.86 | 957.45  | 18 |
| 9  | 977.41  | 959.40  | 960.38  | 489.20  | P         | 1798.86 | 1780.85 | 1781.84 | 899.93  | 17 |
| 10 | 1091.45 | 1073.44 | 1074.43 | 546.23  | N         | 1701.81 | 1683.80 | 1684.78 | 851.41  | 16 |
| 11 | 1188.50 | 1170.49 | 1171.48 | 594.75  | P         | 1587.77 | 1569.76 | 1570.74 | 794.39  | 15 |
| 12 | 1259.54 | 1241.54 | 1242.52 | 630.28  | A         | 1490.72 | 1472.70 | 1473.69 | 745.86  | 14 |
| 13 | 1330.59 | 1312.57 | 1313.55 | 665.81  | A         | 1419.68 | 1401.67 | 1402.67 | 710.34  | 13 |
| 14 | 1427.63 | 1409.62 | 1410.60 | 714.32  | P         | 1348.64 | 1330.63 | 1331.62 | 674.82  | 12 |
| 15 | 1542.66 | 1524.65 | 1525.63 | 771.83  | D         | 1251.59 | 1233.58 | 1234.56 | 626.29  | 11 |
| 16 | 1629.69 | 1611.68 | 1612.66 | 815.35  | S         | 1136.56 | 1118.55 | 1119.53 | 568.78  | 10 |
| 17 | 1758.73 | 1740.72 | 1741.71 | 879.87  | E         | 1049.53 | 1031.52 | 1032.50 | 525.26  | 9  |
| 18 | 1845.77 | 1827.76 | 1828.74 | 923.38  | S         | 920.49  | 902.48  | 903.46  | 460.74  | 8  |
| 19 | 1944.83 | 1926.82 | 1927.81 | 972.92  | V         | 833.45  | 815.44  | 816.43  | 417.23  | 7  |
| 20 | 2057.92 | 2039.91 | 2040.89 | 1029.46 | I         | 734.38  | 716.38  | 717.36  | 367.69  | 6  |
| 21 | 2156.99 | 2138.98 | 2139.96 | 1078.99 | V         | 621.30  | 603.29  | 604.28  | 311.15  | 5  |
| 22 | 2228.02 | 2210.01 | 2211.00 | 1114.51 | A         | 522.23  | 504.22  | 505.21  | 261.62  | 4  |
| 23 | 2375.06 | 2357.05 | 2358.03 | 1188.03 | M(+15.99) | 451.20  | 433.19  | 434.17  | 226.12  | 3  |
| 24 | 2504.10 | 2486.09 | 2487.07 | 1252.58 | E         | 304.16  | 286.15  | 287.13  | 152.58  | 2  |
| 25 |         |         |         |         | R         | 175.12  | 157.11  | 158.09  | 88.06   | 1  |

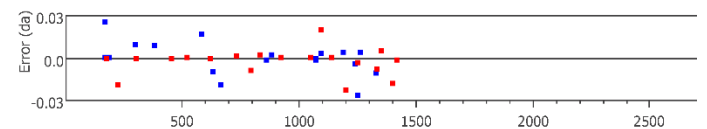

## S2936-phospho, S2944-phospho, Htt from mouse brain

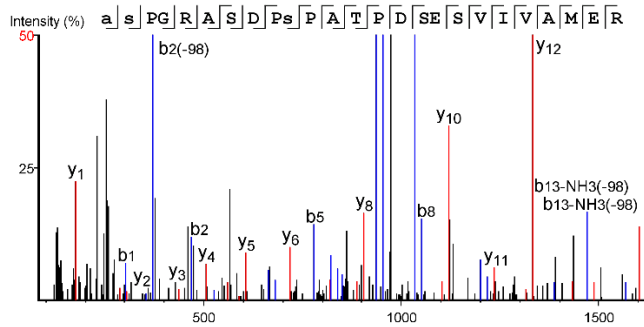

| #  | b       | b-H2O   | b-NH3   | b (2+)  | Seq        | y       | y-H2O   | y-NH3   | y (2+)  | #  |
|----|---------|---------|---------|---------|------------|---------|---------|---------|---------|----|
| 1  | 301.21  | 283.20  | 284.18  | 151.10  | A(+229.16) |         |         |         |         | 25 |
| 2  | 468.21  | 450.20  | 451.18  | 234.60  | S(+79.97)  | 2616.10 | 2598.09 | 2599.08 | 1308.55 | 24 |
| 3  | 565.26  | 547.25  | 548.23  | 283.13  | P          | 2449.11 | 2431.10 | 2432.08 | 1225.05 | 23 |
| 4  | 622.28  | 604.27  | 605.25  | 311.64  | G          | 2352.05 | 2334.04 | 2335.03 | 1176.53 | 22 |
| 5  | 778.38  | 760.37  | 761.35  | 389.69  | R          | 2295.03 | 2277.02 | 2278.01 | 1148.02 | 21 |
| 6  | 849.42  | 831.41  | 832.39  | 425.21  | A          | 2138.93 | 2120.92 | 2121.90 | 1069.97 | 20 |
| 7  | 936.45  | 918.44  | 919.42  | 468.73  | S          | 2067.89 | 2049.88 | 2050.87 | 1034.47 | 19 |
| 8  | 1051.47 | 1033.46 | 1034.47 | 526.24  | D          | 1980.86 | 1962.85 | 1963.83 | 990.93  | 18 |
| 9  | 1148.53 | 1130.52 | 1131.50 | 574.77  | P          | 1865.83 | 1847.82 | 1848.81 | 933.42  | 17 |
| 10 | 1315.53 | 1297.52 | 1298.50 | 658.26  | S(+79.97)  | 1768.78 | 1750.77 | 1751.76 | 884.89  | 16 |
| 11 | 1412.58 | 1394.57 | 1395.55 | 706.79  | P          | 1601.79 | 1583.77 | 1584.76 | 801.39  | 15 |
| 12 | 1483.62 | 1465.61 | 1466.59 | 742.31  | A          | 1504.73 | 1486.72 | 1487.70 | 752.87  | 14 |
| 13 | 1584.67 | 1566.65 | 1567.64 | 792.83  | T          | 1433.70 | 1415.68 | 1416.67 | 717.35  | 13 |
| 14 | 1681.72 | 1663.71 | 1664.69 | 841.36  | P          | 1332.65 | 1314.64 | 1315.61 | 666.82  | 12 |
| 15 | 1796.75 | 1778.74 | 1779.72 | 898.87  | D          | 1235.59 | 1217.58 | 1218.57 | 618.30  | 11 |
| 16 | 1883.78 | 1865.77 | 1866.75 | 942.39  | S          | 1120.57 | 1102.56 | 1103.56 | 560.79  | 10 |
| 17 | 2012.82 | 1994.81 | 1995.79 | 1006.91 | E          | 1033.53 | 1015.52 | 1016.51 | 517.27  | 9  |
| 18 | 2099.85 | 2081.84 | 2082.83 | 1050.43 | S          | 904.49  | 886.47  | 887.46  | 452.75  | 8  |
| 19 | 2198.92 | 2180.91 | 2181.89 | 1099.96 | V          | 817.46  | 799.45  | 800.43  | 409.23  | 7  |
| 20 | 2312.01 | 2293.99 | 2294.98 | 1156.50 | I          | 718.39  | 700.38  | 701.36  | 359.70  | 6  |
| 21 | 2411.07 | 2393.06 | 2394.05 | 1206.04 | V          | 605.31  | 587.30  | 588.27  | 303.15  | 5  |
| 22 | 2482.11 | 2464.10 | 2465.08 | 1241.56 | A          | 506.24  | 488.23  | 489.21  | 253.62  | 4  |
| 23 | 2613.15 | 2595.14 | 2596.12 | 1307.08 | M          | 435.20  | 417.19  | 418.18  | 218.10  | 3  |
| 24 | 2742.19 | 2724.18 | 2725.17 | 1371.60 | E          | 304.16  | 286.15  | 287.13  | 152.58  | 2  |
| 25 |         |         |         |         | R          | 175.12  | 157.11  | 158.09  | 88.06   | 1  |

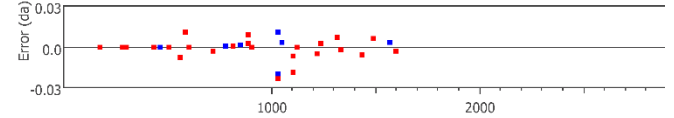

## T2947-phospho, Htt from mouse brain

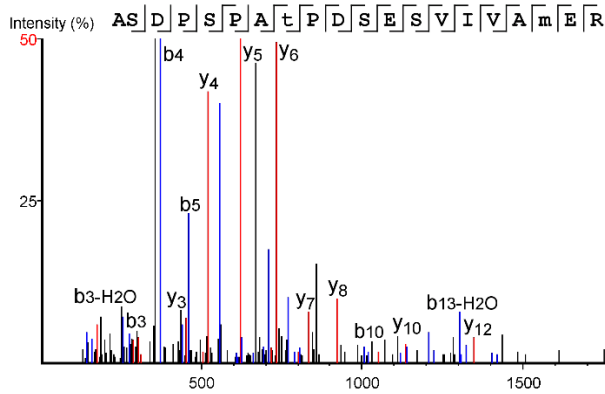

| #  | b       | b-H2O   | b-NH3   | b (2+) | Seq       | y       | y-H2O   | y-NH3   | y (2+)  | #  |
|----|---------|---------|---------|--------|-----------|---------|---------|---------|---------|----|
| 1  | 72.04   | 54.03   | 55.02   | 36.52  | A         |         |         |         |         | 20 |
| 2  | 159.08  | 141.07  | 142.05  | 80.04  | S         | 2083.89 | 2065.88 | 2066.86 | 1042.44 | 19 |
| 3  | 274.10  | 256.09  | 257.08  | 137.55 | D         | 1996.86 | 1978.85 | 1979.83 | 998.93  | 18 |
| 4  | 371.16  | 353.15  | 354.13  | 186.08 | P         | 1881.83 | 1863.82 | 1864.80 | 941.41  | 17 |
| 5  | 458.19  | 440.18  | 441.16  | 229.59 | S         | 1784.78 | 1766.77 | 1767.75 | 892.89  | 16 |
| 6  | 555.24  | 537.23  | 538.21  | 278.12 | P         | 1697.75 | 1679.73 | 1680.72 | 849.37  | 15 |
| 7  | 626.28  | 608.26  | 609.25  | 313.64 | A         | 1600.69 | 1582.68 | 1583.67 | 800.85  | 14 |
| 8  | 807.29  | 789.28  | 790.27  | 404.15 | T(+79.97) | 1529.66 | 1511.64 | 1512.63 | 765.33  | 13 |
| 9  | 904.35  | 886.33  | 887.32  | 452.67 | P         | 1348.64 | 1330.63 | 1331.61 | 674.82  | 12 |
| 10 | 1019.37 | 1001.36 | 1002.35 | 510.19 | D         | 1251.59 | 1233.58 | 1234.56 | 626.28  | 11 |
| 11 | 1106.40 | 1088.39 | 1089.38 | 553.70 | S         | 1136.56 | 1118.55 | 1119.53 | 568.78  | 10 |
| 12 | 1235.45 | 1217.44 | 1218.42 | 618.22 | E         | 1049.54 | 1031.52 | 1032.50 | 525.26  | 9  |
| 13 | 1322.48 | 1304.47 | 1305.45 | 661.74 | S         | 920.49  | 902.48  | 903.46  | 460.74  | 8  |
| 14 | 1421.52 | 1403.54 | 1404.52 | 711.27 | V         | 833.46  | 815.44  | 816.43  | 417.23  | 7  |
| 15 | 1534.63 | 1516.62 | 1517.60 | 767.82 | I         | 734.39  | 716.38  | 717.36  | 367.69  | 6  |
| 16 | 1633.70 | 1615.69 | 1616.67 | 817.35 | V         | 621.30  | 603.29  | 604.28  | 311.16  | 5  |
| 17 | 1704.74 | 1686.73 | 1687.71 | 852.87 | A         | 522.23  | 504.22  | 505.21  | 261.62  | 4  |
| 18 | 1851.77 | 1833.76 | 1834.75 | 926.39 | M(+15.99) | 451.20  | 433.19  | 434.17  | 226.10  | 3  |
| 19 | 1980.81 | 1962.80 | 1963.79 | 990.91 | E         | 304.16  | 286.15  | 287.14  | 152.58  | 2  |
| 20 |         |         |         |        | R         | 175.12  | 157.10  | 158.09  | 88.06   | 1  |

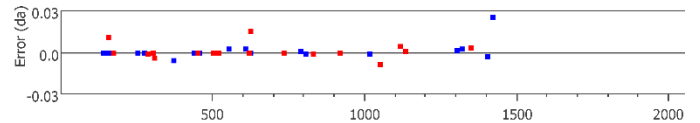

## K2969-acetyl, Htt from human brain

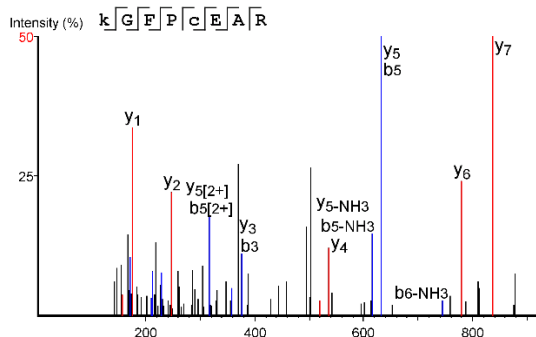

| # | b      | b-H2O  | b-NH3  | b (2+) | Seq       | y      | y-H2O  | y-NH3  | y (2+) | # |
|---|--------|--------|--------|--------|-----------|--------|--------|--------|--------|---|
| 1 | 171.11 | 153.10 | 154.09 | 86.06  | K(+42.01) |        |        |        |        | 8 |
| 2 | 228.13 | 210.12 | 211.11 | 114.57 | G         | 836.37 | 818.36 | 819.34 | 418.69 | 7 |
| 3 | 375.20 | 357.19 | 358.18 | 188.10 | F         | 779.35 | 761.34 | 762.32 | 390.18 | 6 |
| 4 | 472.26 | 454.25 | 455.23 | 236.63 | P         | 632.28 | 614.27 | 615.26 | 316.64 | 5 |
| 5 | 632.28 | 614.28 | 615.26 | 316.64 | C(+57.02) | 535.23 | 517.22 | 518.20 | 268.11 | 4 |
| 6 | 761.33 | 743.32 | 744.32 | 381.16 | E         | 375.20 | 357.19 | 358.18 | 188.10 | 3 |
| 7 | 832.37 | 814.36 | 815.34 | 416.68 | A         | 246.16 | 228.13 | 229.13 | 123.58 | 2 |
| 8 |        |        |        |        | R         | 175.12 | 157.11 | 158.09 | 88.06  | 1 |

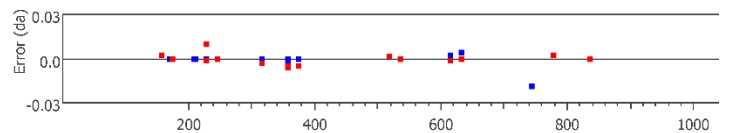

Supplement: Supplementary file 1 [file 8806042]
